# Supplementary material for: Differentiating Gliosarcoma from Glioblastoma: A Novel Approach Using PEACE and XGBoost
Source: Preprints.org preprint supplement (doi:10.20944/preprints202405.1505.v1), 2024-05-23
Supplement: Supplementary file 1 [file supplementary]

X1	X2	X3	X4	X5	X6	X7	X8	X9	X10	X11	X12	X13	X14	X15	X16	X17	X18	X19	X20	X21	X22	X23	X24	X25	X26	X27	X28	X29	X30	X31	X32	X33	X34	X35	X36	X37	X38	X39	X40	X41	X42	X43	X44	X45	X46	X47	X48	X49	X50
0.581593701411	0.434806084959	24.8993893875	57.265503517	36.2491379207837	58.9406481131655	57.3149195236284	62.1369455316239	33.3052561537	0.711565938016	6752.79360686648	0.215606437001	31320	61.4994336676	460.697209926	390963339.03	6.87270901071	212.288992883	2.69091090888	664.179240977	123.85846107	259.756625273	261.469841068	-119.314906569	783.494147546	86.9631836062	580.549189331	0.00349951991362	10556010153.8	0.00990041617122	23709.881696	6159.40921793	76.1009193183	22225700.8377	-37466.5840371	2753.25847094	1283.70040544	0.363063672111	27.3088125505	6.06101628107	510.9549387	0.000657945022871	10.6436581088	-0.45565422487	0.999058441926	0.0409917414647	0.955613484339	0.0936697519722	0.863861269001	0.04202338175
0.880683603941	0.6753408727	42.0329766668	62.2396457344	64.1326749792958	71.1196175467781	66.6108099335235	72.1248916810278	54.8134355133	0.760515623931	13638.6594446135	0.137302401464	99333	72.2712058065	271.442415485	814160165.907	5.91678215812	111.388095374	3.04462265192	473.158608003	63.2929435421	163.960211825	154.750064794	-19.5297630171	492.68837102	45.7958830687	470.42460735	0.597352913621	21982324479.5	0.0189155688557	6040.23304412	1435.24217939	36.3692997854	1376902.28665	8618.35548143	697.763097329	248.195232244	0.472760349664	11.5909982841	4.9719172378	111.505659975	0.000674774479729	10.9262424764	-0.144259521914	0.900958559734	0.105630447511	0.977015366431	0.182221008761	0.902645274597	0.109361558658
0.796112497794	0.690908108472	36.3843927411	52.6616959548	54.0832691319598	62.4259561400544	48.8364617882991	63.0713881248859	41.9246343047	0.744005617084	9415.73538255114	0.170779108763	55134	100.383816643	489.787179823	787073932.992	6.8166509083	213.98144682	2.3475520932	684.910661228	121.13785757	303.347417511	310.955228337	-41.8624296511	726.773090879	89.1010539526	620.84029381	-0.145735231052	21250996190.8	0.00985235615253	21414.5642001	5504.41756795	71.3426646771	18590344.9026	-45006.8013439	2641.3354983	983.028361067	0.458805669422	24.1375943059	5.94624059433	388.97245579	0.0004109312998	11.3738035503	-0.334660997317	0.994792117659	0.0479993712159	0.95988085629	0.10313715648	0.868836512565	0.0484805420605
0.601960947338	0.54650003572	20.5916309397	37.6791026418	30	32.4499614791759	36.2491379207837	40.3608721412211	22.6813483211	0.717543364817	3000.99065966232	0.319390236235	9396	114.953954146	193.328297161	71810953.8978	4.64000523115	43.3865182364	3.20844285101	265.235444068	25.4348961358	153.125892876	151.038842479	63.3030661197	201.932377948	17.5941340833	454.261285824	0.302986739566	1938895755.24	0.0477606024574	1030.24100364	411.120193289	19.9706164611	31611.091325	383.120184764	97.4399670682	48.7811903137	0.32845808596	5.49748386952	3.79870655323	17.9959928036	0.00496813288411	7.92404631258	-0.254865274548	0.948804044778	0.165350765739	0.974577873639	0.25943555194	0.89096868665	0.166053377207
0.810709810476	0.699008565013	29.7522826891	42.563545253	46.6690475583121	38.1837661840735	45.7930125674212	49.2950301754649	34.5066837052	0.730716203265	6153.24341486726	0.217045623099	28350	151.903925946	321.802056787	293606026.987	5.72314018622	79.1744167426	4.18390136131	499.906279838	53.8193559037	223.784841388	214.789190021	-27.5720402895	527.478320127	33.6166313297	528.795600971	0.128421125126	7927362728.64	0.024968707483	5274.22753836	2670.82891569	51.1055309055	1349265.53209	-1276.66947678	573.037137682	336.88029662	0.26062895751	13.2415718585	5.11229845743	157.911147973	0.00132631706318	9.86577762974	-0.290436021683	0.982118661486	0.0964814960696	0.973384396925	0.171034688708	0.897844456315	0.100628017611
0.774345976325	0.691102525921	41.9341921648	60.6772375907	63.6396103067892	66.0681466366357	62.6418390534633	66.1362230551458	46.9851747828	0.637861353816	12282.2641595201	0.188363839575	65205	53.8213918838	290.514453111	580841040.859	6.07918551581	122.214844008	2.58777526676	493.859660091	70.5008540022	182.6652128	186.15376112	-35.6441605548	529.503820646	50.3724234942	490.422153409	-0.0381845840748	15682708103.2	0.0165883517868	7548.18090681	2302.03628109	45.6139000485	2993199.24892	-7866.66998794	1109.69263519	224.17521953	0.66498952324	11.3466049452	4.90850708621	92.8315076466	0.000653600286995	10.8537337419	-0.225577828713	0.967329996723	0.0962408291169	0.981764402017	0.173680066391	0.909741309575	0.101392566683
0.944480945224	0.683218458808	26.6138101851	38.9535877464	45.6946386351834	43.2666153055678	39.1152144312158	48.0936586256441	36.7909213745	0.796813319387	5352.43257351496	0.204369323158	26190	114.357415559	277.09135916	243110830.764	5.57271740299	80.6537343723	2.73228464769	377.866716057	49.3590656588	196.840545784	198.214854499	37.7618835044	340.104832553	34.6223612997	500.629326385	0.0843999982867	6563992430.62	0.0242151131895	3779.19450166	1104.67177275	32.0759862671	575704.950919	1094.79658752	441.391838131	138.697070383	0.521092203302	9.28417128228	4.56833293587	50.5306171817	0.00139879074002	9.72163866042	-0.243888786909	0.965598851133	0.105654741185	0.973181376394	0.188402963227	0.888438399686	0.109384976249
0.737269996507	0.547725894595	27.2312090844	49.7168553708	46.57252408878	57.6281181368956	48.4664832642105	57.9396237474839	36.6547457856	0.697068661297	6991.92309171235	0.218531742201	31995	58.0737150206	289.965153829	284794313.903	6.09227846317	124.734970142	2.56142707113	424.495132025	70.8635417291	182.421916682	188.628402202	-48.5773412365	473.072473261	50.592466409	490.237446906	-0.194120643454	7689446475.39	0.0166191315494	7601.84865346	2347.86761782	46.8000056808	2533557.17176	-10077.6661194	981.337969361	351.172201256	0.475052806314	14.2945107993	5.18897449522	142.668254569	0.000847494197258	10.3650228226	-0.310775378943	0.988872895552	0.0753006640725	0.965801175258	0.146295305079	0.878746582628	0.0779981383639
0.9372433601	0.708227912886	24.0611611644	33.9737543899	37.9473319220205	37.9473319220205	36.1247837363768	41.2431812546025	31.8416757196	0.776197686323	4085.83865813043	0.243291571879	16794	61.6982452935	308.327071188	149842306.114	6.05087591801	132.491143022	2.60833803356	460.117538354	75.2206168315	182.062545828	174.20071209	-33.9425625429	494.060100897	54.4651172788	490.819752172	0.338783366357	4045742265.08	0.017333360904	8519.73103239	1982.65253802	43.1220839846	2444575.14651	4333.95211224	955.468841307	463.667145205	0.347358810154	16.0692430391	5.31559126365	199.482429426	0.00143561526859	9.56507975178	-0.418705760007	0.996821481628	0.0773915608839	0.960180942884	0.145332460467	0.873214567842	0.0789283330676
0.689860348906	0.501021545067	9.07496652755	18.1129267132	17.4928556845359	16.1554944214035	10.8166538263919	17.7482393492988	12.4953899421	0.893376305286	696.019452439256	0.477379597009	1458	103.944944604	267.251248126	13761766.6115	4.79610162233	73.7591689396	2.88124105375	282.782917838	47.8453642738	201.36971001	215.888749005	43.2474804575	239.535437381	33.1035562737	504.824256393	-0.836375916023	371567698.511	0.039780521262	3475.94372707	904.71885579	30.3181784688	301030.611693	-3301.41782165	316.78276468	378.001362428	-0.0731263111971	15.5690544695	4.06419683598	122.269138412	0.0200336161872	5.69538017689	-0.776975042403	0.99961066887	0.0691591199455	0.884839070063	0.135580542727	0.782186335427	0.0707475352002
0.772794909642	0.637874516883	46.0757474496	72.2332468692	82.9759001156359	82.3771813064758	68.4105255059482	84.5340168216322	55.8214854875	0.63885110814	18051.4996346836	0.155013693611	116451	52.3810230873	225.088465671	880249634.259	5.68546333509	87.7384957388	2.77034493982	460.715019764	51.9198727552	147.129649355	150.59641546	-19.0460103733	479.761030137	36.8979038095	451.765640965	-0.00411443957313	23766740125	0.0222494188653	4167.27102432	1213.68451833	33.2949554835	833612.702941	-1903.24270684	562.614228554	142.264116065	0.596658968561	9.02861362944	4.61388194951	59.6919580384	0.000794314228483	10.6552374691	-0.134361128205	0.883344010364	0.116649750555	0.98571576957	0.200303522087	0.919382737901	0.120046211508
0.45018178048	0.418736949063	19.0884989717	45.5858959052	46.57252408878	45.891175622335	21.8403296678415	47.4341649025256	20.5219397834	0.771476576941	3263.66574657514	0.274719338937	11880	152.989606285	361.860142462	139409447.769	5.92337012089	108.27443106	2.75441573205	468.897990414	65.8006863836	257.012407575	259.018097041	35.6291149938	433.26887542	46.9412824954	562.885116184	-0.212752201253	3764055089.77	0.019132231405	6576.83182908	2053.83815957	44.8254007333	1310310.56609	-4764.81327753	654.972250403	477.503481328	0.157930837012	17.0117458364	5.32957451508	181.940017534	0.00188802997744	9.1262977936	-0.460932242744	0.997850554916	0.0632309801216	0.946653786106	0.128615229281	0.849719691866	0.0673604917952
0.842356749899	0.663313741744	26.2548975952	39.5814166705	44.2944691807002	41.7851648315523	37.589892258425	44.698993277254	33.3416735029	0.830850874849	4897.59090869329	0.200655150307	24408	-33.9852751678	290.688332082	181556694.844	6.51869475637	177.633766512	2.76469684693	558.296152907	101.471230095	130.44265976	128.753276664	-124.638507019	682.934659926	73.7892892177	448.148470732	0.26891228099	4902030760.8	0.0123296655964	15556.1684778	2741.42416196	49.9496104783	8548986.14806	8994.93532965	1815.53371052	832.169192197	0.369302101466	22.0493216801	5.76477060773	334.357652689	0.000856487737643	10.2751703312	-0.427073172038	0.998100485957	0.0513546396067	0.961449594796	0.109739080871	0.871931089923	0.0545080843939
0.88082377783	0.790906036713	40.4688195617	51.1676705995	55.3172667437573	61.773780845922	58.2494635168427	64.3428317685816	45.0697009203	0.751684897079	10000.9528767301	0.163174300485	61290	125.414324717	299.164211321	594732245.662	5.77172152765	90.8672148772	2.95747090183	432.220176977	54.1869526436	207.33651252	202.685354776	-24.18901843	456.409195407	38.000952435	511.85601881	0.192625211834	16057770632.9	0.0213293485222	4606.24705591	2368.4397323	47.9508672176	765402.301307	993.387584794	503.531091952	227.164572519	0.378228521823	11.6754752598	4.92955540813	88.4418989811	0.000790111210562	10.6028058933	-0.160778067034	0.91676506742	0.0859595196174	0.975393928817	0.163242661051	0.894242408842	0.089074291596
0.690882516415	0.604520537426	36.6690306864	60.6580395805	56.0446250768082	68.4105255059482	48.3735464897912	69.4550214167413	41.9075790262	0.756699378277	10071.3405027472	0.160989473981	62559	35.0363681393	300.615412515	505603973.73	6.17761639669	160.616036322	2.88902548945	538.525146466	86.9638487675	155.149249806	145.466597229	-18.9717330565	557.496879522	65.5665552519	467.134800422	0.677557085489	13651307290.7	0.0164409389681	11054.0821657	1331.4957496	33.0687082205	5250709.14067	33622.1615984	1343.25760593	392.850703883	0.545523045049	13.8855621658	5.21646857287	196.42298261	0.000866323495172	10.736934549	-0.23925338558	0.97213246757	0.106657709873	0.972559565218	0.179215806402	0.899464588999	0.109581934866
0.572305652625	0.529647684308	30.2205011016	57.0577423387	61.8465843842649	53.160135440008	42.953463189829	63.1426955395475	32.6544684665	0.710300668625	7425.43037340347	0.206158875379	36018	96.6354392458	268.329185605	310373086.637	5.74813571042	95.7897574983	3.22850065969	457.792659081	55.2611121066	177.430134475	170.719998233	10.3189226006	447.47373648	39.2710284589	482.352032478	0.520252653758	8380073339.19	0.021343526138	4723.94993058	1187.97472015	33.2904080714	801752.38273	4014.68275388	529.53300368	211.129539987	0.427284102631	10.8018742821	4.84027303311	92.3426233047	0.00107327837369	10.1208243406	-0.231646375041	0.963655223495	0.104706163376	0.976413547636	0.184064920224	0.900245126882	0.106657103534
0.861872081628	0.563853858587	26.0888013388	46.2687289295	48.8364617882991	47.4341649025256	43.6806593356831	52.1344415909483	39.8777257168	0.715369007461	6740.03595489412	0.214091733527	31482	4.3001515064	213.761871366	205455674.904	5.86887014164	116.122323369	2.64335564902	380.631779557	63.450179546	112.589793757	114.504622615	-52.8744496443	433.506229202	46.8572490288	419.768451757	0.149502060404	5547303222.4	0.0189400068846	5975.21517862	1177.32620454	32.1144618836	1436723.77945	1735.96158452	769.564078226	186.45648594	0.609990435297	10.3550707772	4.75741740162	75.7703945053	0.00107043666896	10.0782105602	-0.277984853931	0.980212131599	0.107444277773	0.977810733088	0.187247005832	0.901409465096	0.10720751894
0.734140583326	0.505372278503	21.4466877704	42.4374044296	43.2666153055678	41.6773319683494	32.4499614791759	47.4341649025256	31.1550208428	0.772168082654	4422.53546324673	0.235680014029	18765	85.6067109247	290.726653394	166712286.15	5.89147658046	102.92534158	3.34023735122	488.969564146	62.5439086081	183.297586524	176.440465448	12.6963335695	476.273230576	43.1772211899	489.769122161	0.561698271513	4501231726.06	0.0195869778997	6297.23588239	1275.86628536	35.0879121837	1171517.35187	5230.0287594	605.858706142	427.455517955	0.173017859525	15.9330966884	5.294554507	168.850937189	0.00131698197804	9.69407885987	-0.355508988879	0.992337963269	0.0650060779491	0.959627325305	0.133701835046	0.868381722224	0.0656114240633
0.879399168743	0.706440702106	24.4657944065	34.6324813018	34.2052627529741	36.1247837363768	37.9473319220205	39.1152144312158	30.4557752683	0.827090084478	4005.15387335148	0.223402157148	17928	115.07991297	331.919671005	189326832.887	5.97962574539	112.707575121	2.68083517176	457.892993747	65.8953955071	227.604427423	225.564931942	25.1249581662	432.768035581	46.200970541	533.976378149	-0.0247971607127	5111824487.96	0.0181539410655	6764.34058467	1750.22302481	40.7769387386	1677615.1323	-5160.04081877	753.653498166	404.026136557	0.304499079325	15.4296524932	5.25253076966	160.33551029	0.00132761770598	9.67451876486	-0.388193636724	0.995209317444	0.0747339793844	0.954271366146	0.142455784887	0.861514856129	0.0836536104087
0.866949086479	0.830099972443	38.2283388839	46.052692631	51.6139516022557	51.6139516022557	45.891175622335	54.6626014748657	39.9253398063	0.82915864506	7827.60612872846	0.159204469029	49167	39.9159979941	315.542693761	424752501.122	6.31842543766	165.011705211	2.4693869947	505.822701997	88.4510799195	171.158277635	169.198047238	-45.6691610589	551.491863056	66.778769254	482.962042503	0.374537973923	11468317530.3	0.0140248567494	11262.2119148	2062.82770289	42.8575934346	4460651.60617	15766.0520962	1370.71051568	467.659084282	0.49029442721	15.8221972438	5.38233074106	212.451059212	0.000629966676629	10.8802177588	-0.272432440942	0.983618445493	0.0818737473307	0.967526579994	0.151018183054	0.886465485426	0.0829344034526
0.709644866782	0.528210528922	28.8703086981	54.6568216977	46.57252408878	59.169248769948	54.7448627726839	62.785348609369	38.7869329524	0.694857920533	7544.86705611407	0.211376339332	35694	-16.8561128947	224.369217427	228174027.113	6.0775419329	126.804816139	2.93608742998	460.51387725	72.6819397793	105.498833594	104.909881299	-78.133343749	538.647220999	52.2248683583	415.448673044	0.359027688211	6160698732.05	0.0166906603253	8168.29588813	1533.34992553	36.3461340547	3254502.32829	9923.99506344	1142.37749434	293.780982541	0.592043215311	12.4298592316	5.03216676427	136.138122162	0.00088495643101	10.3590802262	-0.30319739297	0.98753098805	0.0965609320465	0.977788731518	0.172532247086	0.905073221855	0.100320966231
0.851149478126	0.638233081788	42.4728437912	66.5475435278	76.8374908491941	67.4166151627327	67.6830850360708	77.7688883808943	56.6419069443	0.695089072267	15043.8601647527	0.14961869122	100548	139.70957066	330.150664667	1077634101.26	5.96804119147	97.649005388	3.74677086775	498.789134565	60.2450703897	232.211933031	231.177251136	-47.180692897	545.969827462	40.2375076128	537.936269445	-0.0465225621088	29096120734.1	0.0194358652501	6125.88832403	3521.53805262	58.1224927276	2492928.04763	-5952.89960782	790.835695071	217.962095454	0.568083670563	11.0659480508	4.88502100329	92.7389631172	0.000639525304238	10.9744000677	-0.166339398757	0.927103929167	0.0993843044579	0.983246186123	0.17780523424	0.913941740091	0.102300380986
0.796264051498	0.635815301537	35.4084149707	55.6897811128	49.2036584005701	63.2850693291869	62.6418390534633	63.7102817447859	44.3437707359	0.777431904282	9521.49848284576	0.158993729467	59886	51.4518775887	357.23481626	586552703.298	6.46524803991	151.742082373	3.34411797271	633.675834855	91.7653330552	200.907876518	192.767971481	-28.2936670154	661.969501871	63.8178268342	514.24816355	0.572557518339	15836922989	0.0130528888567	13542.4729561	2475.43628602	45.9196771398	11716222.7405	44792.4674447	1888.64331739	421.89139907	0.635269128881	15.4060269358	5.34266512282	179.410040441	0.000499277288083	11.1762188487	-0.277889932214	0.986267811042	0.0738721675454	0.978182917763	0.143664970613	0.902947944999	0.0748013087793
0.684112426284	0.566260067682	41.6176469046	73.4956414548	63.5688603012512	84.0535543567314	75.8946638440411	84.5340168216322	50.279281597	0.742582531951	14492.1473962253	0.138052006137	104976	2.85962400876	166.912240093	605265628.89	5.65854017801	94.259635319	3.26630043533	427.259298297	52.3339785529	89.3181058044	91.8215098508	-68.4961300909	495.755428388	38.436934129	394.557113828	0.229836028816	16342171980	0.0222773141797	4106.72856532	1107.3736025	31.8016890242	773859.396424	1794.8412579	527.794037981	143.775542082	0.571719494828	8.94272755397	4.58497046323	61.9614765777	0.00081453714058	10.5872107816	-0.132170760129	0.874307389738	0.118483153129	0.986505978003	0.202663951521	0.922366827666	0.121308872823
0.165469144305	0.124107057363	8.12781148204	65.490324682	10.8166538263919	41.7851648315523	10.8166538263919	41.8927201313068	10.8366279854	0.764947710266	643.108055220928	0.626810970001	1026	65.1007980645	164.707628332	6234695.56087	4.34359782985	47.4183368623	2.55172931281	185.18191231	28.379902805	103.544135748	98.0890997043	52.5637838624	132.618128447	20.0707852608	405.05670691	0.704657028846	168336780.144	0.0567867036011	1223.06631569	150.191861734	11.3282539483	46379.3990744	775.510908541	144.168117481	61.578653254	0.414258671352	6.02131686133	2.77371100926	22.4211541964	0.0436817383704	4.61899550048	-0.839320759689	0.999248793512	0.155888762387	0.936675973254	0.245736327989	0.839049719381	0.198818066681
0.841678279735	0.653821340879	31.75210727	48.5638893758	49.9299509312797	54.0832691319598	49.9299509312797	55.0726792520574	40.875170867	0.717721869466	8125.40442194764	0.194030241468	41877	87.9334075172	308.332244395	396222992.534	6.06402517049	118.942079126	2.84587509747	489.767881101	68.5688016998	198.271263743	194.681835191	-36.3013312585	526.06921236	48.8069231156	505.433400489	0.255368968435	10698020798.4	0.0170024039731	7188.67005864	2464.58170818	48.5153735451	2050585.42751	3955.8324363	816.675722138	373.56469312	0.372844522701	14.9987957028	5.2644884246	144.355122343	0.000710139420116	10.6506428001	-0.249096189437	0.975462798116	0.069603367172	0.969955389049	0.139283907642	0.884179969372	0.0706639815545
0.862862127622	0.676998417741	22.7079068404	33.5420382756	32.4499614791759	34.2052627529741	36.1247837363768	37.3496987939662	28.9421545112	0.793495410028	3682.05841892198	0.24795006188	14850	118.388890336	208.701746683	117421336.576	4.77000644186	45.615054044	3.0232236828	267.401608568	27.8460017608	160.733036942	157.28230185	76.7620162258	190.639592342	19.4230227647	462.053394349	0.530750878143	3170376087.56	0.0421553719008	1218.40789982	360.482183062	18.5593853806	49224.0436972	647.765699062	130.14651947	66.2769571436	0.32745297801	6.38032203543	4.02674658616	24.4836364705	0.00313048206571	8.58164524748	-0.201991769985	0.923489614449	0.143961985905	0.961561405813	0.235672067854	0.869139492603	0.155624358577
0.703238698488	0.613759759608	33.895285722	55.2256566049	60	51.6139516022557	52.4785670536077	64.3428317685816	38.836818874	0.71555712006	8735.13403506474	0.187985754085	46467	68.4132515601	258.457968583	374575731.354	5.84856627587	97.9941035463	3.12299788945	442.20940359	57.5387269645	160.902674157	156.75683693	-21.9168212025	464.126224793	40.4424455381	466.52979248	0.321754742876	10113544746.6	0.0201249830764	5218.77222634	1475.87571912	37.5702815118	1005699.74696	2485.77628396	568.469587123	311.180746344	0.29300190781	13.2123432969	5.11079117041	132.643943307	0.00079672545875	10.5341247593	-0.207649754275	0.954888631918	0.0838786742269	0.968967616274	0.158070381989	0.885994127703	0.0888715373857
0.877360030467	0.737499352084	35.1222509447	47.6234329501	54.0832691319598	47.4341649025256	52.4785670536077	55.8032257132148	41.782896584	0.760075145223	8245.79616450616	0.176736028903	46656	111.443015382	236.60100271	388678983.392	5.35479590436	58.3272772925	4.61584701862	399.350581081	39.6366991382	171.215765354	165.716944595	17.0621760479	382.288405033	24.5477002834	474.26782227	0.625276913466	10494332551.6	0.0314690232767	2885.66972269	1057.19320051	31.7261710571	470284.638014	2726.92446922	330.233804373	127.698468994	0.441472068201	8.35811957774	4.49607116544	56.7655838104	0.00155653236003	9.77462436761	-0.175057353382	0.918885575204	0.128300966969	0.980356818003	0.213513675458	0.908426004281	0.133906646435
0.799428247738	0.540672646056	30.4590315148	56.335440191	61.8465843842649	54.0832691319598	60.3738353924943	62.4979999679989	45.0361422375	0.648384369445	9304.81051306035	0.211165815928	44064	-44.8509516154	329.625067715	346065732.67	6.66909017315	190.902351747	2.91145605854	606.805504122	111.753316498	138.777280744	123.806934746	-115.764810227	722.570314349	78.301042935	460.488958926	0.547713507601	9343774782.09	0.0112073781719	19524.5791956	2977.94683149	50.8727237573	17087551.5922	50358.5729295	2490.74323022	932.305692371	0.456341703212	22.1110918333	5.8207077025	431.312985707	0.000575587400543	10.9271433343	-0.365480519592	0.996205884331	0.0589939600151	0.9628363175	0.120109862186	0.88029399483	0.0614677850087
0.980441929054	0.851466344096	39.8595489393	46.812829674	57.6281181368956	54.0832691319598	53.6656314599949	57.9396237474839	45.8972610301	0.71574334056	9761.95085743213	0.177755032183	54918	73.5500252782	323.37870131	529596871.303	6.17260507247	126.387742029	2.85092587359	558.127983402	74.7537199612	201.662245849	203.507853807	-4.65786038425	562.785843786	53.1940336408	510.266704562	0.250150088463	14299115525.2	0.0157209445329	8707.10087468	1843.49270672	40.6868198725	3268698.01306	1707.65738201	1117.55078697	365.893916419	0.506688192752	14.1293244504	5.22545395364	162.592008878	0.000619983976282	10.8884583899	-0.242456859403	0.974691335807	0.0841905902276	0.974332755425	0.156587712819	0.896972154319	0.087219541208
0.852649630165	0.728561472736	12.171857668	16.7066996039	17.4928556845359	15	16.1554944214035	17.7482393492988	14.2449612385	0.851243951548	851.814842733152	0.463951439397	1836	109.023000366	184.057014956	13796638.5861	4.21103523252	37.0160428248	2.38266980297	213.379722139	22.9801542495	149.564073737	153.20721499	93.0895328769	120.290189262	16.4720449647	450.435060705	-0.0768580402133	372509241.824	0.0592560553633	783.887517798	182.919105458	13.4842582799	9985.49950287	-55.6123086513	60.282937075	56.8660991169	0.0312213844444	6.13218974237	3.6126888702	18.3641644026	0.0176117003902	5.9256325541	-0.539061630458	0.993344532315	0.142779996156	0.925055937722	0.236096981167	0.818184637112	0.144674718097
0.742991763915	0.593739761432	36.5370665706	61.53717326	58.2494635168427	67.4166151627327	60.67124524847	68.4762732630799	45.7216129067	0.773248929691	10620.9648412088	0.15176275779	69984	11.6314023232	326.701464515	572986867.378	6.48182600119	169.040775276	3.14371277709	588.483671708	98.0592091538	154.151626985	137.095498646	-53.456480333	641.940152041	70.2701013797	470.169914198	0.7333294623	15470645419.2	0.0128011402606	14806.0479238	1981.90724299	40.8926309409	9540291.88556	43520.3698833	1826.75528971	588.794087701	0.511618437989	17.078962024	5.50008235516	290.947165874	0.000496736125654	11.2613556467	-0.257736847632	0.981797317358	0.081391855207	0.969705446796	0.149608780513	0.893577295795	0.0845671464002
0.761764033001	0.617673798885	20.5910574217	33.3364592425	31.8904374382039	34.9857113690718	30.886890422961	39.4588393138977	25.3945156385	0.777726036053	3118.6182512319	0.277654758835	11232	70.1344566721	196.483352458	80417456.8727	5.22332894967	60.604727639	5.50343407643	400.671440692	39.5707861413	136.471046107	134.515893849	23.4561305446	377.215310147	25.8807125721	439.671689338	0.892639676476	2171271335.56	0.0316313794379	2804.220316	537.512523629	22.5600961148	377616.192104	2834.30126268	281.940610349	167.981963883	0.252969075896	9.65238991223	4.56360389145	73.0133728819	0.00267678339117	8.70765514742	-0.330586500741	0.983718203322	0.106356478359	0.974946127875	0.188963754843	0.896276758082	0.113925307692
0.628945767451	0.555097294057	34.5858834049	62.3059845098	48.4664832642105	67.6830850360708	67.6830850360708	68.2788400604462	39.1870852443	0.721721627633	9649.33208010135	0.176572465234	54648	47.4928835006	253.590970706	423079000.783	5.94356896083	111.418319277	2.90749210509	470.140263576	62.9589554324	150.505093064	149.518542787	-24.9014474753	495.041711051	45.3812805692	457.19922011	0.315377195078	11423133021.1	0.0182103297974	6076.28799209	1299.40820967	34.2814342746	1570554.38862	6438.02875977	752.146951183	256.097502147	0.492077742608	11.9245787966	4.98379143581	111.357114111	0.000727547136984	10.6739017601	-0.20560446109	0.955215254246	0.0936631758457	0.976800968904	0.170338329828	0.900702298672	0.099226334541
0.760075252064	0.584612944889	41.5165080985	71.0153760046	60.7453701939497	85.8020978764505	79.7119815335185	85.8545281275251	53.9770298171	0.69523878669	15223.1616856239	0.148686920668	102384	145.108820337	359.698144989	1142176034.18	6.00834037961	111.036654991	2.95697971833	468.887635258	65.9036549242	242.54248171	238.239005665	-42.8492717875	511.736907045	46.3815154648	548.82306809	-0.186904266982	30838752922.7	0.0180751949474	6854.41560789	3658.88506703	58.919915229	2588164.89052	-5005.35626013	945.729100661	196.733402584	0.65614687442	10.4148335869	4.81537184366	86.4018697517	0.000652810044081	10.9528691356	-0.181717915995	0.941088498516	0.108308383015	0.98283437644	0.187897426057	0.913766216959	0.113828240669
0.886427213288	0.742288099483	38.4227423819	51.7625735999	55.8032257132148	57.9396237474839	54.7448627726839	62.2093240599831	45.8837538688	0.767635277921	9821.88715221158	0.159549823785	61560	-66.591963101	194.644029029	324544242.326	6.15999121516	162.37995012	2.62929209613	467.626053703	84.4420704592	63.6017302559	60.1701311237	-111.622888229	579.248941932	65.1179136599	377.284992986	0.413930554713	8762694542.81	0.0157748538012	10137.7476874	1397.32752531	34.0391195352	4227148.35148	18974.8518052	1299.42870478	345.762475178	0.579131780011	13.1362259066	5.13483450712	168.854613538	0.000853506662886	10.7638883009	-0.239529703747	0.972272563862	0.106897087364	0.977443161167	0.180118711607	0.907083280118	0.110392574745
0.467730310282	0.409938841713	25.3809639634	61.9140256565	33.5410196624968	60.7453701939497	59.7745765355138	63.6396103067892	28.9590664311	0.711817812343	6344.65152772648	0.222315131144	28539	193.543494422	414.84628438	407951660.394	6.01015478405	122.374511972	2.51072279273	543.916993665	70.174854367	315.370533589	320.635376078	85.9837059208	457.933287744	51.4996581973	621.250653938	-0.283303272946	11014694830.6	0.0176639227245	7271.48140801	2572.78935891	49.6781782931	1324025.78722	-5175.83820602	696.364976969	278.8086525	0.422790591916	12.4340744874	5.01672571815	121.937545216	0.00109947228471	10.0418618718	-0.295119789264	0.984338734684	0.0914433627259	0.970815803203	0.167169763472	0.889829995837	0.0965511179147
0.717837112258	0.627325707097	36.9117782802	58.8398942727	49.9299509312797	70.8025423272356	60.2992537267253	71.3722635202219	42.2374597903	0.753880573624	9936.65107782632	0.16298676439	60966	-13.1637382837	282.683264619	439317641.354	6.35638968714	171.448804335	2.49621626105	482.04538333	91.523691269	126.87274567	118.983160889	-69.477479163	551.522862493	68.2253098166	441.090143087	0.447757226837	11861576316.6	0.0135544047304	12340.1733329	1748.8964069	38.2284272127	6461810.66972	27418.6284163	1610.86047404	461.871575569	0.553958924533	15.5405242808	5.35665677626	214.463864072	0.000608900177081	11.0276190953	-0.260698660484	0.981228740793	0.0912100009569	0.967237823418	0.160320165265	0.887881879196	0.0981712454965
0.743493649655	0.610729853744	39.7102551938	65.0209826004	66.0681466366357	75	66.6108099335235	80.3865660418455	48.3426876577	0.600672176915	14387.5746980861	0.190447868823	75546	82.2069148504	347.943845706	757416472.58	6.38368935956	128.713128302	3.41046872348	622.93384336	82.7842116392	209.117292394	201.598483046	-34.6975301541	657.631373514	54.4107045264	520.287650886	0.399338920032	20450244759.7	0.014398878807	11498.8222494	2867.53671797	50.4985267251	8691824.91165	15983.825255	1643.54221071	374.084859569	0.630578533318	14.5139429466	5.25997851938	158.530872694	0.000486517906695	11.268568418	-0.252217688564	0.980319600284	0.0781146185622	0.980222881963	0.149076429636	0.90711833763	0.0802202316043
0.547956405591	0.398175540157	26.9859442812	67.7739880018	46.8614980554399	72.5603197346869	64.7610994347687	73.5459040327875	37.1371908581	0.696237802671	8608.54865343784	0.197298969872	43632	87.1316546388	280.312898374	380687043.337	5.90437979246	96.6663047975	3.22457549455	456.585769156	59.1806498696	179.504945399	174.152886943	-48.059943424	504.64571258	40.5954525591	485.359315797	0.212561448757	10278550170.1	0.0197744093716	5648.67276908	2249.8320064	46.4462272091	1437329.81935	3011.63791541	657.006045155	287.213350842	0.391230959237	12.8552659557	5.06958380286	118.419517111	0.000820424916299	10.4931587909	-0.232175238603	0.967328782628	0.0847718248733	0.974872111742	0.159456386084	0.89551554162	0.0893190401993
0.765302717435	0.669001261863	29.3126042174	43.8154692501	38.418745424597	49.6588360717405	46.8614980554399	50.4678115237821	33.5320976828	0.751919964959	5968.32968783197	0.211126311077	28269	34.334232244	217.885640561	193853541.723	5.79044334319	97.6452072391	3.41723236674	398.637195793	57.1600605006	124.166682159	116.976260553	-15.8522138188	414.489409612	39.5229821902	430.292255054	0.639776268145	5234045626.51	0.0208618976856	5234.05050496	907.256125813	28.6998634973	1174780.54943	6211.94516059	602.590641036	268.680746494	0.382172447909	11.9465143043	4.96461941446	122.314616658	0.00113969235668	9.9925603804	-0.2770560903	0.979429757596	0.101868757248	0.966969782873	0.178573992494	0.885974642083	0.106776106987
0.756671357783	0.492972485792	23.4493189871	47.5671962696	41.6773319683494	47.4341649025256	45	54.0832691319598	35.9927349872	0.659063101484	5888.54091731439	0.259019130699	22734	80.2479243728	436.898396212	280484612.53	6.68216996982	186.370589507	2.67410632766	654.546539833	110.018703375	260.821920223	271.259983003	-94.779807623	749.326347456	77.7609073681	577.162989994	-0.183550071817	7573084538.31	0.0111599460621	18595.8908159	5698.1713062	73.1211223909	14199346.0794	-31418.6175644	2205.17437284	800.481917266	0.467362189095	22.0096895587	5.73629810288	308.068268326	0.000951303375531	10.1088593844	-0.484394107461	0.999206840273	0.0479461394462	0.968003311658	0.105971332487	0.880577241025	0.0497889813561
0.824970326193	0.697612495088	21.5831319053	30.9385684133	34.2052627529741	29.5465734053883	26.8328157299974	34.7275107083706	25.5234008759	0.863622148335	2941.88777397935	0.2443022566	12042	-56.4585864713	219.533918948	73718980.6708	6.16193414161	171.546762267	2.57533531128	418.468191703	92.0055954801	91.0962623481	101.635273207	-97.2078775058	515.676069209	69.144784313	406.557738002	0.286289795279	1990412478.11	0.0161776830421	12332.9079065	1362.28563385	34.0563420347	4448343.76317	11003.2916293	1352.10400832	546.126855447	0.422761713213	16.5569875313	5.28633163826	265.999275327	0.00188101096188	9.15466377141	-0.495128098924	0.998785088151	0.0782578914528	0.958779806109	0.147558833472	0.876238490206	0.083269481567
0.532924258943	0.454894869089	28.2391191312	62.0783417227	40.3608721412211	56.9209978830308	48.3735464897912	57.6281181368956	33.0830542589	0.509924513881	5847.13044392039	0.381940717481	15309	39.0538411938	223.502606509	111073275.084	5.62028793242	81.054696033	2.82850344143	294.779067934	51.9011638508	137.639515471	142.449010214	-28.7575563873	323.536624321	34.8988124374	442.601885129	-0.298582108796	2998978427.27	0.0240661422319	4368.0832177	1282.06799477	34.1616044316	1047445.75516	-3961.79668819	626.757251409	167.389987175	0.581867372994	9.52484978566	4.60230955131	74.2973229915	0.00222488271974	8.98867127672	-0.411945850841	0.995115424554	0.123394857216	0.965492322629	0.205427653274	0.882853796078	0.12376874466
0.782868378113	0.545453861977	12.6546098688	23.2001471636	16.9705627484771	21.6333076527839	19.2093727122985	22.6495033058122	18.1626615819	0.696428679357	1217.63078797055	0.524388797576	2322	70.7259978394	225.971190507	16835045.8491	5.124539907	92.5894966775	2.42211848541	275.452639131	50.7608705791	138.212091276	130.336581654	14.6394949367	260.813144194	36.6789831273	442.443608929	0.234160465565	454546237.925	0.0348837209302	3726.51014189	874.479416973	28.8201278526	392655.013131	257.443808576	400.628340748	229.972021994	0.26657380909	12.0473455948	4.24919815467	77.6522993737	0.0134577647529	6.27537881592	-0.744670005938	0.999680939565	0.0842595166459	0.93464406808	0.158701969007	0.832345577854	0.0922478512554
0.531898521694	0.444830519185	29.4265465665	66.1522654076	48.4664832642105	45.7930125674212	66.6108099335235	67.6830850360708	35.186292177	0.658769264382	8584.13774296988	0.214673212368	39987	82.0172275543	382.230657115	423116202.884	6.4742389965	162.521968262	2.6846114632	596.275851785	93.4588351974	222.008348243	211.276317281	-50.9869851418	647.262836926	66.9584287299	534.505648464	0.337912085244	11424137477.9	0.0127771944518	13203.572605	3378.55766544	56.4838245627	6394977.88862	2323.58759185	1501.62178515	749.643772271	0.335035273475	20.7392428462	5.7218724561	311.189211284	0.000614523566261	10.8014258673	-0.34059115425	0.99401461621	0.0547537465963	0.962064577222	0.115722511626	0.874017228707	0.0560802989111
0.846366298966	0.790309649198	43.9929149406	55.6654154296	57.6281181368956	61.773780845922	62.4259561400544	65.9317829275077	47.1133316375	0.697424768084	12302.8763105773	0.164617805483	74736	96.0439615624	280.413703665	674171940.497	5.82421753032	98.5506373792	2.76056612743	422.276312799	56.6843313198	188.467013975	184.204116733	15.4408886549	406.835424144	40.2031405209	493.517200367	0.22212644021	18202642393.4	0.0201479438839	4959.20331681	1352.94667618	35.0127632926	1187061.61222	1266.28309077	675.747271978	167.626018842	0.6036150205	9.65624830686	4.69193638174	72.3587754197	0.000764721431228	10.6769744027	-0.177553118252	0.933942057217	0.110291098744	0.977367885697	0.192799058225	0.901707392797	0.117188878948
0.885435819056	0.74181405015	38.1543261972	51.4338144303	55.1543289325507	59.169248769948	60.7453701939497	65.2456895127946	45.5413416073	0.675369842469	10453.7436990321	0.187403529795	55782	79.1625397885	246.447843277	446549838.801	5.66979979609	89.6929917763	2.80295269959	397.884487489	51.5700093661	160.496091528	157.027111095	-0.165148818057	398.049636307	36.938924349	464.910987119	0.308527869748	12056845647.6	0.0223547426691	4085.57563186	1172.24754403	33.2998585652	571307.854093	1734.82164315	465.958966129	212.543447274	0.374081762301	11.1607129855	4.87690293677	85.4309057786	0.000866694074538	10.4520071126	-0.161415206996	0.914638172481	0.0964628695113	0.97079575175	0.174311224466	0.887173322349	0.0995230830112
0.887243750055	0.771517590835	29.1404970578	37.7703598777	44.5982062419555	49.9299509312797	37.9473319220205	50.2891638427206	33.5115157388	0.68387813277	5211.4677590939	0.260482219178	20007	100.597923479	224.87753796	160407089.817	5.3079703716	64.0717941547	3.60312117287	358.657828218	39.4003476769	162.492163015	161.758090969	2.03262970003	356.625198518	26.51667347	465.267455794	-0.0080075503246	4330991425.06	0.030277864286	2574.80457066	1104.61478907	32.8739037804	242466.270031	-203.56347389	268.216507753	172.644977412	0.219378382708	10.0770172676	4.69312259555	69.1037685853	0.00186330906167	9.31457022005	-0.256234627338	0.966791774844	0.104727742566	0.970120041427	0.185390439937	0.885600213509	0.105544180509
0.791622801666	0.573521440275	22.8723129235	39.8804845248	41.7851648315523	41.7851648315523	36.4965751817893	43.4741302385683	31.5703008913	0.769418311687	4485.04959658573	0.235287461787	19062	119.307177653	312.677899641	192988560.398	5.83061630641	93.0171474296	3.23407159921	441.441381255	57.9953209888	217.524206934	220.005145817	-20.3965448129	461.837926068	39.5085098802	522.833531264	-0.213159404385	5210691130.75	0.0207328523622	5523.59665104	2502.42532399	48.960516738	1587439.3219	-7507.17043751	678.182178042	257.27222916	0.451423551041	12.5572343502	4.97138927079	97.0370707483	0.00141119037616	9.62669730822	-0.353185062283	0.991859489808	0.0768883620022	0.97331198712	0.152139200419	0.88929316012	0.0827529591527
0.795373116802	0.6304018016	36.8426685661	58.4431524031	64.202803677098	57.706152185014	56.9209978830308	66.1362230551458	46.4841122826	0.545396063687	12498.330813827	0.23617405166	52920	-39.2658983722	233.021526183	327155087.125	6.31809749825	131.507568743	3.98420098303	512.29623018	83.664681176	93.8107104683	84.4094477111	-106.643597326	618.939827505	55.6948489995	408.553375678	0.845935525327	8833187352.38	0.0148250728863	11828.9850986	1930.69199045	40.1855042632	12421170.1354	66653.2137652	1678.11075605	415.55803264	0.604203668216	14.6622482714	5.26791668956	194.905902683	0.000660861572955	10.8089344916	-0.297789561995	0.988433861685	0.0881522590238	0.976314151852	0.15941779007	0.903046398805	0.0909766352527
0.935226144556	0.727415012574	37.1763494196	51.1074816672	57.706152185014	59.0931468107766	58.2494635168427	60.4483250388296	47.7970530375	0.774731616813	9856.72794640058	0.157084336495	62748	105.083361097	335.882842964	618315048.869	6.07667045384	129.929327739	3.24066856229	611.707012982	73.6582854218	207.765003408	194.423024797	29.3340454349	582.372967547	53.1771522114	515.80654257	0.721317454794	16694506319.5	0.0172968737502	8231.09067197	1435.32747425	35.8703709026	2515994.90202	15997.0805244	947.753055789	353.899749923	0.454986528823	13.6246779429	5.18900445529	164.964312922	0.000709564892191	10.8272818061	-0.208700889341	0.958264152651	0.0925235510215	0.977127273838	0.166118241107	0.904175909949	0.095216776147
0.606778098851	0.536520852152	31.3347459965	58.4035939532	42.953463189829	64.1326749792958	60.0749531835023	65.5896333272263	35.438021705	0.612729961468	7891.54638423036	0.249598202999	31617	7.33273251732	269.566602237	233471251.204	5.94619738057	196.27779595	1.90344738303	418.658439689	90.9151505682	134.243128582	140.469334123	-60.020066972	478.678506661	74.9147802729	446.517266953	0.179638168405	6303723782.5	0.0212282159008	10810.5749664	1592.33473527	36.9343202945	3450595.45239	13569.3178665	1349.9804303	438.949216931	0.508599458592	14.1431256253	5.16419558882	236.210795958	0.00246767844523	9.64369942986	-0.336084158307	0.989718880865	0.148663381786	0.961146154486	0.215191963404	0.887295166887	0.148731821788
0.971800464244	0.604874813826	39.1309884953	64.6927059961	68.5419579527751	74.5184540902453	70.0357051795725	74.7596147662626	62.8684017202	0.772263828665	14255.8886713997	0.131244314372	108621	55.6449463349	148.478438267	631527846.006	4.81424191879	46.5084558347	4.34128800161	259.074788498	30.1156426947	94.2529599422	85.2299100555	-61.5921177782	320.666906276	19.8235920758	396.206171522	0.625021375998	17051251842.2	0.0467225830298	1543.93392885	1019.98163673	31.4380982777	139899.194843	1319.57058386	172.222525894	45.8608186464	0.576206902464	4.20335653607	3.58553489471	27.8372433222	0.00576118125066	8.55899744448	-0.172657523493	0.888529950994	0.313468151361	0.990046970512	0.384748410763	0.943984881779	0.298538055807
0.891973284763	0.729870505441	15.7974658606	21.6442036538	21.2132034355964	23.4307490277199	18.9736659610102	24.1867732448956	19.3060514291	0.883546851079	1499.81112833071	0.330646192313	4536	133.143548702	255.595836424	42559488.9762	4.9334071507	60.8500286747	2.77473935421	292.545308727	36.7277375898	201.206723688	208.691605419	82.4744856469	210.07082308	25.7690842744	503.319273945	-0.535355325804	1149106202.36	0.0378401360544	2122.11165479	684.273588842	25.9095167208	97500.9595638	-1260.80731836	169.043952319	117.607377054	0.173771892784	8.60452091987	4.28632696567	42.5956194277	0.00610905135297	7.47529462602	-0.444157572238	0.992781051742	0.112288226851	0.945662615714	0.196767661671	0.845920475532	0.120163268394
0.878947230761	0.768668163153	25.4272568174	33.0796279022	38.418745424597	32.4499614791759	33.5410196624968	39.4588393138977	29.0752473393	0.816648617304	3854.26419028792	0.232114675717	16605	168.03262437	301.195157547	174874714.567	5.40324704525	68.6338652196	3.35404881584	407.557105271	42.9733466939	230.446055692	225.755095366	44.6320717128	362.925033558	29.2800616128	533.243967971	0.261897748419	4721617293.32	0.0283032586423	2976.11137895	1587.07286535	39.3505789591	309068.407882	1220.57940093	310.764842913	156.677954545	0.329048341857	9.80235106748	4.62248628121	58.6974661278	0.00190600788727	9.23078772683	-0.28866329372	0.97745703899	0.0976373984392	0.973753607335	0.179874816813	0.890055053233	0.104184690586
0.827896865635	0.713267944529	31.1780506929	43.7115545876	49.9299509312797	46.8614980554399	44.5982062419555	52.1344415909483	36.1886590351	0.749801669268	6390.01023530982	0.204906533119	31185	60.9096937304	372.309125764	314488566.743	6.49088477309	165.906048554	2.53260434711	558.54058053	94.9823990165	208.68203972	203.302798913	-44.9537601072	603.494340637	68.6032937875	521.80884754	0.223249916658	8491191302.06	0.0124143100766	13527.0558365	2943.68787673	52.0627921789	6998914.09984	-927.335007179	1616.25320851	683.952865315	0.405901217061	20.1437569548	5.64771767095	268.815890314	0.000714714291847	10.5541796922	-0.38191586256	0.996554497517	0.0521466941565	0.959289211351	0.113554977905	0.868125118016	0.0560635351876
0.889461053542	0.701585155204	37.6298735923	53.6355042766	60.3738353924943	57.6281181368956	61.773780845922	63.7102817447859	47.7066921411	0.766750775648	10121.5107383515	0.157442573745	64287	114.594912579	364.867871393	695633281.332	6.29359007722	135.660817905	3.05125791333	538.716700249	79.7650731093	231.239856428	229.523582538	-70.8447231738	609.561423422	56.3444157132	540.518394652	-0.104198175359	18782098596	0.0148136558478	9944.34989907	4280.01958804	63.7334697765	5198613.40361	-15284.758847	1236.25087029	364.863919449	0.54422261286	14.6089835218	5.25421517456	147.363145241	0.000520345180734	11.1332092649	-0.232737812026	0.972725504439	0.0741540875633	0.977802230764	0.144519769179	0.900346556562	0.0781804367913
0.733007688947	0.601878944374	32.2977792158	53.6615867987	51.2640224719051	55.3172667437573	48.3735464897912	64.621977685614	39.3343557245	0.716990412765	8300.65304201749	0.192264911913	43173	134.503726372	395.741434526	534925411.798	6.36495711754	135.38457114	3.13305773131	610.234362717	82.1516784652	268.959406505	268.312516147	-32.2582992599	642.492661977	56.464864253	578.392140586	0.226239788062	14442986118.5	0.0143354918901	10822.6620407	3996.55014834	61.7369644029	5353043.94745	2290.05815181	1292.07918016	552.068854597	0.402875122056	17.8912600555	5.52138679351	225.757908277	0.000615578135256	10.8314401375	-0.306772250858	0.99005280298	0.0608734866793	0.970791081817	0.125553506437	0.887379722606	0.0612883425644
0.933683220072	0.816874742573	44.2634308274	54.1863134217	61.773780845922	63.7808748764079	57.6281181368956	65.5209890035246	50.5928515994	0.743167622573	11942.6517149873	0.151895753396	78624	38.5945313696	229.556759548	545241315.018	5.80220039319	108.188616872	3.8149213276	454.858406393	61.704352662	125.768509306	116.728772621	-50.8235163398	505.681922733	44.2186941141	432.711754607	0.894557028995	14721515505.5	0.0208959138389	5960.63905845	1354.04307782	35.2724192363	1524945.87187	12390.5579655	687.584305072	248.470100996	0.467372633439	11.0561080854	4.90840918918	123.841874474	0.000976487685545	10.5324310858	-0.16801051419	0.922195423377	0.11827211969	0.978660448025	0.196852382661	0.909939770395	0.122435955804
0.781906360621	0.657877459442	27.3911298331	41.6356107661	39.1152144312158	44.5982062419555	40.8044115262063	44.698993277254	32.5551488864	0.74583612901	5346.66465301674	0.22579773863	23679	102.080037268	235.165041194	197487111.266	5.34054667966	66.3254149772	3.04685071384	341.410809164	40.8542150702	171.706865637	174.15165039	35.254968919	306.155840245	28.0144246015	474.536455406	-0.0283707180363	5332152004.17	0.0292629714911	2677.48042061	843.430478765	27.8540024318	357369.407171	-751.936203478	363.345774302	93.1472534259	0.592270186138	7.24656505209	4.26578154702	39.531087607	0.00185133926546	9.37450101737	-0.255912939118	0.967249374143	0.141508652628	0.977883364206	0.229708497827	0.902154919212	0.148583913368
0.878505729966	0.70201604534	46.5852013678	66.3591689636	77.1297607930946	67.4166151627327	73.5459040327875	78.0576709875461	58.2969101703	0.632196813782	17607.1826677973	0.159442023615	110430	113.042408997	299.616780074	1056434041.45	5.90487309799	92.3935432475	3.45044552775	511.618683474	58.0428577563	202.733333734	198.030412571	-22.8254068518	534.444090326	39.2046805648	508.229113343	0.299203933039	28523719119.1	0.0200655184988	5556.02680261	2268.1888127	46.5040424721	1547922.73273	2924.98884867	680.371188509	258.197736934	0.451087235963	12.0991296631	5.01359878629	108.948504396	0.000615231877743	11.0535332178	-0.14045612635	0.898427860801	0.089972510863	0.979576619625	0.166413862113	0.905571321802	0.09466926075
0.916249304259	0.743477020073	39.6353044188	53.3107323411	57.6281181368956	63.0713881248859	63.0713881248859	66	48.845921417	0.728005692646	11012.4816496503	0.163147876291	67500	98.8388769531	348.869305975	716122068.925	6.19631190204	140.21986571	2.61221371834	543.003331889	77.4455714175	226.77270586	229.025348984	36.4172652813	506.586066608	56.7783696357	535.209143765	0.227680191741	19335295861	0.01524064	8959.34393149	1778.50051623	39.9015170602	3249382.07752	-1600.33029251	1081.11703991	336.188472547	0.525457763976	13.3756073758	5.15707300998	153.288389219	0.000591770213442	11.0015620964	-0.222825609564	0.96729066084	0.0943049038801	0.971671685793	0.167201560485	0.893174236616	0.0965530137742
0.771360490963	0.590915472465	36.5868361896	61.9155156607	56.6038867923396	67.6830850360708	68.4105255059482	70.2922470831599	47.7591825583	0.712678622521	11571.0106519936	0.164323600488	70416	107.690233148	385.560133317	845428872.999	6.45015429787	134.405286455	3.63973233833	662.978229578	86.780215905	257.891559916	260.032618201	-28.4623331455	691.440562723	56.7303371618	569.357104683	0.281504810737	22826579571	0.0139251218525	12924.5200271	3541.24070837	57.2555363528	8495343.78465	-2134.75761166	1548.80958402	497.784114414	0.510653295234	16.4793825215	5.44363212216	220.237121265	0.000486910093746	11.2579847839	-0.250372669544	0.979642277576	0.0735905743628	0.976737892215	0.141191235822	0.901432889149	0.0745675737375
0.901675435414	0.651397406525	40.4441079617	62.0882238041	72.6223106214612	68.0147042925278	67.4166151627327	76.9545320302839	55.9834262327	0.686300569028	13713.9855736189	0.159724965917	85860	111.972740275	257.313157974	748065405.77	5.57293032392	75.9776417286	8.21360614099	712.373517704	47.9022268529	180.743012367	171.515787391	-2.40996759389	714.783485298	31.5145693402	485.016178739	1.38999928935	20197765955.8	0.0256850994818	4126.84969884	1474.25226657	37.5317772242	1057566.89053	8477.38083249	431.343428571	169.081396847	0.432233950507	9.27590261266	4.64664746023	81.2843926203	0.00103768869543	10.329385156	-0.135792120359	0.876877813756	0.122150233043	0.992253466928	0.205181289268	0.942449843258	0.129238713802
0.568385124372	0.410907886585	27.9559323417	68.0345480201	53.6656314599949	69.9714227381436	58.2494635168427	70.2281994643177	38.669825038	0.681884810139	9056.07660593513	0.198467600393	45630	10.4000555289	254.18443979	340654478.48	6.15497712887	113.103835045	2.95126592954	468.241424338	71.9897395384	139.443396963	142.973517038	-73.2629963169	541.504420655	48.4396558095	448.966254105	0.0106029853456	9197670918.95	0.0164469031196	8460.19819071	1970.90032884	42.0234478079	3714212.14613	-5345.40892582	1119.00930349	300.193083168	0.577754652726	13.2141655097	5.10853371501	121.742096832	0.000721710956884	10.6620607262	-0.27149781609	0.982194537962	0.0843747020522	0.976783959711	0.157364924265	0.898724955568	0.0903879122165
0.782773088661	0.688094758454	26.2185902132	38.1031680463	45.891175622335	47.4341649025256	34.2052627529741	47.8121323515276	29.8261345394	0.780908221567	4543.3742778014	0.228631958424	19872	55.9219383838	296.165308328	164070521.904	6.05371479471	134.850999123	3.00844023191	539.471851391	75.7442767111	162.920262043	148.180236923	-4.28371512081	543.755566512	55.1000188115	472.146062952	0.674632000318	4429904091.41	0.0170907667769	8626.73575118	1144.27292251	31.8776628153	2307174.43686	14487.4101167	906.412905855	395.782912156	0.388574630712	14.3577441377	5.1861075348	184.912677094	0.00135441503504	9.70347844921	-0.375419761484	0.994281879207	0.0931230325456	0.970686955558	0.164726138553	0.893304769676	0.100784250749
0.537107287292	0.504124100634	28.5393429344	56.6117408363	37.1079506305589	54.7448627726839	55.3172667437573	55.4797260267207	30.4065785495	0.673938027997	6671.644096473	0.235331361428	28350	163.965110962	387.873276403	356241079.948	6.12119386121	119.117028957	3.24650744035	607.336459627	71.2434474991	275.410702077	273.805801888	24.1577953424	583.178664285	48.7830176705	582.475080152	0.141434908719	9618509158.58	0.0169886621315	8179.74293277	2831.99341214	52.2041963994	2823264.73762	-809.071920015	876.601607245	450.061546348	0.321403429116	16.2391044834	5.35277504544	182.158942614	0.000945723974527	10.2025446989	-0.332216320096	0.991323186434	0.064765686681	0.971058673264	0.132218516754	0.887184678249	0.0674909831673
0.695429362686	0.652748908576	29.6449596845	45.415563772	42.6380112106556	53.4134814442945	37.9473319220205	53.497663500381	31.5833165699	0.758101766305	5809.84185208277	0.211374585319	27486	75.4795008856	222.590051884	203905151.759	5.49084567685	80.063756829	2.97151228341	339.856358337	47.6284215859	143.728664934	135.220604622	-0.239563534687	340.095921872	34.3565039373	447.548607582	0.519621227057	5505439097.49	0.025789231939	3404.62806453	970.690762337	30.2502096204	411525.049109	3176.51432479	388.347677296	166.090066114	0.399934264026	9.77398373648	4.68263637719	68.5101046653	0.00141512122558	9.72187287845	-0.230120448029	0.958550461523	0.110957375279	0.968843590984	0.192455271131	0.884923874072	0.114419630414
0.869629903358	0.62161857632	34.1799210506	54.9853597571	61.8465843842649	55.8032257132148	61.8465843842649	69.1303117308174	47.8169130917	0.68125431769	10080.6019505828	0.188373172452	53514	93.1725881685	273.761712801	479902121.273	5.80488327349	97.5424064727	2.76699283529	424.990619983	56.5993911908	187.071857311	189.733309513	-29.1668815566	454.157501539	40.262094934	492.067305082	-0.176569040221	12957357274.4	0.0204601249795	4891.23854618	2000.51363915	43.7852023885	928991.22447	-4390.45135587	566.541892795	233.313090776	0.416384943027	11.9328414592	4.95823540992	88.9822995115	0.000784399312818	10.5764013918	-0.180792825068	0.936445253607	0.0855077361743	0.974160006306	0.16119881943	0.891055570643	0.0881460158877
0.836115381746	0.648336257345	43.2505821141	66.7101085649	67.4166151627327	71.3091859440282	74.0945342113708	75.7759856418905	55.7773478891	0.686174380917	15353.6750641928	0.150996981415	101682	-14.5423364361	144.097027601	499326194.167	5.62699378755	99.5305984564	3.47633343774	378.525765237	54.5920758458	57.9927605779	50.5291517035	-91.9200696394	470.445834876	40.2548120797	364.126273729	0.683917489641	13481807242.5	0.0245062384208	4429.12659383	957.637215135	29.6768950489	809373.344866	6460.76347383	503.097104874	195.818103758	0.438555672334	9.49503800432	4.70194640993	103.753925771	0.00135371258127	10.3202768113	-0.147641523531	0.894154104593	0.148709221176	0.980714825742	0.227988995922	0.916655809399	0.152603712545
0.592442827183	0.522140908334	28.7968342567	55.1514616018	41.7851648315523	58.2494635168427	53.160135440008	60.1498129672902	32.6740878346	0.724458992532	6949.06562809809	0.206891319165	33588	-33.4517494704	191.488131341	179856139.45	5.88110206396	148.230777416	2.17823758711	332.929471591	75.1966871379	70.1636022409	58.3354713291	-72.4917340433	405.421205635	59.4652811272	380.23530903	0.444417940428	4856115765.15	0.0192085999938	7557.7978093	878.764538787	26.5732246243	1909085.03977	14419.9119458	921.266667577	233.030789361	0.592998820945	10.6961794454	4.82575807285	115.290785307	0.00145570694776	9.89456536501	-0.285874342131	0.981044008032	0.133214292633	0.970070047974	0.210032062675	0.895146214294	0.135653661325
0.652233898887	0.57020880679	26.3851585203	46.2728007812	43.2666153055678	50.9116882454314	37.1079506305589	51.2640224719051	30.1806892659	0.766376254047	5375.98045274059	0.216189345427	24867	113.490918571	246.059150136	210223301.404	5.36105869666	61.4675932443	5.15280122879	438.040354313	41.4870558296	174.464084222	167.828923272	-35.4761713041	473.516525617	26.3036917244	477.760907458	0.811987916865	5676029137.9	0.0307542314036	3139.31747842	1906.49255895	43.3578007873	357460.575746	2983.73994478	276.787405523	170.650515551	0.233945103758	9.26421922058	4.60666466289	82.9311431382	0.00199644644227	9.32401755175	-0.226773321885	0.95181499568	0.12379817402	0.983195232812	0.207522474918	0.91804313602	0.127948002933
0.725976153588	0.374607441664	17.5255175958	46.7836877931	40.2492235949962	45	36.4965751817893	48.0936586256441	33.9638417147	0.623705070935	3857.52343801221	0.347618585024	11097	69.8518829193	149.360033167	69973348.9726	4.54567487393	41.897580392	2.5493765305	180.805051586	24.1492726264	111.556077057	114.075965066	36.3782551688	144.426796417	17.3626368266	412.615386715	-0.131345913012	1889280422.26	0.0486558805596	873.05279192	293.618540695	16.6553925686	32834.289757	-641.313753306	100.250484367	35.7223229	0.475639030627	4.65402194694	3.5902756584	13.4346810061	0.00496811834076	7.92648174276	-0.241604192243	0.940298561024	0.198179648954	0.964654587927	0.290801696261	0.874986671884	0.208651050495
0.483694524051	0.422719487091	21.7271116189	51.398414983	28.3019433961698	45	42.953463189829	47.5289385532645	24.8611318722	0.665432684647	4358.68119763359	0.296751170863	14688	44.2932649686	180.032772138	94535950.8057	5.31320545784	73.0637643357	2.95435210868	304.44380753	42.0252667992	113.598507443	115.848847843	1.70081376984	302.742993761	30.2008743611	416.868470065	0.294480828664	2552470671.75	0.0289454476644	2715.59597457	545.87889666	22.3214816682	297883.67574	1323.64257637	319.613634563	129.419527706	0.422657658507	8.70830492968	4.47100717666	52.1981873736	0.00231758538638	8.94281383236	-0.311494931332	0.981113924133	0.116645239577	0.96897134217	0.201785691439	0.883768230099	0.117936958914
0.323578050774	0.26802145143	34.7794862479	129.763815778	57.6281181368956	106.066017177982	83.5703296631047	119.92497654784	41.9887225704	0.544035544921	16399.7827692311	0.206950378815	79245	122.208380321	286.666630155	745812368.662	5.70818137808	87.4159740908	3.47751518591	499.849746804	52.1660880574	199.76530966	192.773160617	8.2043992581	491.645347546	36.3081222888	504.093082675	0.547958747704	20136933953.9	0.0224643540191	4344.47126087	1642.80738636	39.4697262234	798198.308484	5063.20004142	507.618519341	167.908187972	0.501535455645	9.96105412432	4.72237427748	67.033997831	0.000850335853437	10.5313887308	-0.148939793714	0.901613260357	0.102085092755	0.983876128118	0.183439999859	0.913416692944	0.106296530411
0.747404340893	0.576305779945	31.1191215792	53.9975871527	48.3735464897912	59.169248769948	52.3927475897189	59.84981202978	40.3580310357	0.805586181346	7878.69333553022	0.165703269092	47547	-48.8328317951	187.649780497	233532708.985	5.79019159913	157.489764152	2.62155571336	374.254516561	83.1095986337	51.0429823032	29.7955064191	-91.6576574325	465.912173993	65.3348057401	364.161626902	0.722367806727	6305383142.59	0.0256439526223	9382.51508388	890.834223469	26.4999302714	3120977.06011	27698.0249245	1060.86527691	309.024192213	0.541395740782	11.1096640637	4.8310451865	181.964942196	0.00273873129488	9.72126347981	-0.265625388136	0.973093429472	0.173924030257	0.971098420756	0.245429142721	0.906617046015	0.174664598362
0.847106895017	0.773743772429	34.4549587745	44.530192038	52.3927475897189	49.4772675074119	42.4264068711928	52.4785670536077	37.7218327119	0.753849551682	7173.67672930927	0.191835184632	37395	13.376464308	296.821912157	278950282.527	6.20724192249	155.215507822	3.29365780682	573.558270253	90.1125018498	134.508074137	113.738640418	-37.0597484231	610.618018676	64.6940426544	448.785189405	0.909350063547	7531657628.23	0.0162666006334	12610.879739	1424.69881077	33.6543652058	7782991.36423	52642.1434126	1589.59127838	422.278849294	0.578651731118	14.4173124977	5.23054767203	209.745433274	0.000999522862135	10.3307677752	-0.318997194792	0.989968280922	0.100723360369	0.97535104528	0.172472158435	0.903910103996	0.105138002042
0.82320848708	0.651705274371	31.5725169332	48.4460049272	51	54.0832691319598	45.891175622335	55.3985559378581	39.8811624212	0.786638705332	7327.25490910565	0.17807074242	41148	-20.6595222522	337.814495259	331324687.499	6.64589931878	218.476774124	2.22039189334	496.033212569	116.169233126	145.673348217	132.202483142	-102.331208904	598.364421473	88.9812908868	466.266716151	0.354720756464	8945766562.47	0.0109774663994	18779.9172787	2703.37890809	48.0843569629	11906544.8829	39053.8523626	2318.52714909	755.996585197	0.506607869642	20.466754451	5.7214413372	328.886553567	0.000587979078923	10.8915349214	-0.353248132069	0.995302979606	0.0615172643759	0.956306330132	0.12377208322	0.868080854571	0.0649904831495
0.939596465566	0.737914252501	24.878169804	33.714174404	37.9473319220205	37.9473319220205	36.6196668472011	40.8044115262063	31.6777191095	0.753439497509	4236.28021690325	0.2498395976	16956	144.298073971	293.71374013	169489351.223	5.50259032883	82.4658285577	2.56180879416	366.622650288	47.8832907775	216.188779038	213.889380884	74.9456654372	291.676984851	34.2795673164	519.50697969	0.184236483149	4576212483.01	0.0251734350278	3436.6463419	1048.55192762	31.461904165	394487.393088	154.801536011	396.907363773	162.788338327	0.419331516445	9.76385708742	4.62999364219	65.1403758463	0.00178037225253	9.30863629974	-0.313406500135	0.984091529563	0.103741073332	0.960907893006	0.185865607293	0.870644499366	0.108629921807
0.557654367104	0.515433385996	21.8119502489	42.3176900091	25.8069758011278	40.024992192379	44.5982062419555	45	23.5986446394	0.649283545917	3848.44314361405	0.327666508609	11745	117.308929364	318.729291243	117505059.709	5.8035592085	104.693940401	2.6834411821	412.967922288	61.4303922787	214.146517332	211.849320447	12.694436189	400.273486099	43.4691990104	519.737023931	0.134890574178	3172636612.15	0.0207002246003	5779.93275975	1937.53959396	43.0251610821	1231258.52439	-142.688355874	648.593286321	303.837891333	0.361924108337	13.5797661397	5.01046226454	116.635500246	0.00218068533819	8.94237609581	-0.457866012887	0.997493835897	0.0750142787135	0.959461297685	0.147754744344	0.86683421416	0.0772880520217
0.709444045971	0.637122299777	37.2153347489	58.4116028616	61.1882341631134	56.0446250768082	61.8465843842649	66.6108099335235	41.4397638658	0.651286260997	9286.04211078101	0.209967939917	44226	81.1551222519	264.307219191	372730241.037	5.74957218575	94.7418329438	2.49434715698	358.551195134	55.05165548	172.255002933	170.76621452	-36.6510164769	395.202211611	39.8674018187	477.024150023	0.0338107070174	10063716508	0.0208181453603	4527.25190992	1922.1764543	42.794722937	768562.622682	65.372179225	550.755268269	187.728759015	0.492763670308	10.3611404873	4.79105259729	79.2343083682	0.000920015078919	10.3439741795	-0.201377824746	0.949196425616	0.107088717315	0.973456413013	0.186917334303	0.893221947836	0.110600114042
0.845717735155	0.745937165829	36.4687601612	48.8898553817	52.3927475897189	52.3927475897189	48.4664832642105	57.3149195236284	41.3470177654	0.678944710968	9263.1515645767	0.197512773504	46899	-6.82472085698	192.093674144	295098138.826	5.81613566152	104.501706573	2.73731096581	392.469008191	60.5158852207	105.382508283	115.212598565	-58.6896920889	451.158700279	43.9369037327	412.176593849	-0.0472664681128	7967649748.31	0.0202066904439	5554.56649492	1184.07790403	32.5566540739	1318929.16959	-3295.5516223	709.343315858	213.136456042	0.537598732874	10.8898709906	4.84950574625	91.5594323995	0.000912198820543	10.3826056918	-0.217061175724	0.958356827781	0.106679591955	0.97659302987	0.184546955376	0.900432856033	0.113606261129
0.612495211075	0.400523988147	23.6503439876	59.048508173	42.6380112106556	63.2850693291869	52.3927475897189	64.8305483549229	36.1669284771	0.633877989004	6034.93277818407	0.271257316531	22248	134.154309834	317.380414887	221792420.904	5.65168353343	75.7442049654	4.54398927737	529.178741564	53.3423906606	213.706548688	201.782499883	38.9811300631	490.197611501	32.2208917122	518.811680043	1.07969517565	5988395364.4	0.0257299227071	5271.14118446	1547.95654615	37.6362160596	1988288.21413	21079.9440668	669.823513232	144.556693758	0.642972712187	9.12823030623	4.57254268076	59.7581847571	0.00181908814564	9.39019605795	-0.320152676549	0.985837640661	0.116105231041	0.98608284024	0.199347405247	0.919964223983	0.113783045638
0.54605959768	0.491460790633	36.8348098592	74.9496410726	56.9209978830308	67.0820393249936	69.2603782836911	76.3675323681471	40.9269708504	0.672546160046	11719.476773588	0.178110256593	65799	23.9012182502	243.952164944	489669794.453	6.03414997761	99.9864045251	3.99801042746	531.776558901	65.6791238439	139.881656362	138.425250213	-70.3165309456	602.093089847	43.6471289356	448.253710279	0.563594873397	13221084450.2	0.0184077404681	7435.51717468	1956.84185931	42.4641960658	3013544.67958	7780.72623952	914.820753487	300.910552007	0.503805412418	11.7585397018	4.98074940029	160.307136056	0.000768449995766	10.7000108078	-0.228335055937	0.967379791317	0.113777222144	0.982141053179	0.191409192761	0.919069763397	0.119569744244
0.894633880204	0.639225259233	30.5843620162	47.8459847674	54.0832691319598	49.6588360717405	48.4664832642105	55.4797260267207	42.8046390046	0.757123933032	7732.3123908935	0.183578166925	42120	-11.3638090302	160.981766659	229564627.769	5.72553448467	86.3181214053	3.10599667343	343.464868931	52.5111963561	77.7909589743	79.1902130968	-98.888285904	442.353154835	36.078760643	383.610235359	0.0356851372956	6198244949.75	0.0221351084813	4430.80398953	1403.00942784	36.1334109995	988855.019228	-547.359645252	575.46480614	186.03640463	0.512711752798	10.3987563312	4.78074387333	76.0077387674	0.000976692101915	10.2797825031	-0.217848516126	0.958230186042	0.101757077587	0.978343130956	0.182038605541	0.901815770903	0.103685066688
0.606348323544	0.558793690102	34.0159727624	60.8739385662	61.773780845922	60.3738353924943	45	64.9692234831231	36.9108105971	0.710310413627	8642.14720896449	0.191092254482	45225	20.9541460007	202.589262803	306434652.854	5.65752456541	82.2292556768	2.95525511734	369.791932142	52.0797231148	122.606318673	129.24959848	-38.8238272129	408.615759355	35.7653381583	427.721944031	-0.0865415257912	8273735627.06	0.0233463132101	4349.96082266	1195.05237397	33.044655148	952637.516998	-4752.78645829	566.248661285	154.07677187	0.572143944415	9.26598084763	4.62340484556	66.4205824845	0.00112193989346	10.1176712012	-0.210709949406	0.951975977798	0.114563546775	0.979076289585	0.198100272238	0.905040803266	0.118822002597
0.810953197323	0.728845956269	49.1077883882	67.3774587975	64.1326749792958	76.4852927038917	72.4982758415674	78.5748051222527	54.6399656394	0.776411342293	15594.8098280882	0.124479644222	125280	35.388072945	248.42609374	929038243.144	6.07258639228	122.099213223	2.82873505712	509.250966244	68.5685824216	139.463468158	137.237828344	-58.7362069796	567.987173224	49.3473376689	447.463696067	0.237169988439	25084032564.9	0.0168359839477	7095.61945275	1759.6274211	39.540279564	2642887.00338	6823.49482719	985.267337456	200.786483576	0.661566670824	10.200021719	4.800290374	94.5800579893	0.00060673131982	11.1032928822	-0.176104864189	0.937131711081	0.120947112241	0.985578500128	0.201011789133	0.923041811824	0.123563787678
0.889170310593	0.638833452619	28.308237091	44.3123899898	44.5982062419555	46.8614980554399	46.9574275274955	52.4785670536077	39.4012615704	0.738216995631	6620.75070305572	0.206061335296	32130	113.40356226	362.996849789	351124448.276	6.20578272754	133.055218655	3.80185826689	637.1917625	79.9826159586	233.609080659	220.49006942	10.9418375137	626.249924986	55.3822430233	543.196614106	0.816822348548	9480360103.46	0.0159734482028	10323.910615	2283.64034689	46.0649958206	4687544.32086	24774.1947065	1089.48776839	444.829737731	0.415803070079	15.8866389683	5.34792949377	187.335460755	0.000851647243736	10.3697566621	-0.321649878751	0.990508506115	0.0708593123218	0.974721732925	0.139487369418	0.89562383727	0.0712282590437
0.798906459097	0.739041314311	33.1354642598	44.8357400569	45	48.8364617882991	45.0998891351187	50.2891638427206	35.8195623299	0.779917347265	6796.37863831067	0.187289975703	36288	10.6643770352	348.521633744	336109763.054	6.54090712751	183.208577139	2.58892040301	668.095153414	103.393619196	184.007713244	180.01844401	-59.6657090549	727.760862469	76.0427265322	500.08166227	0.279076531185	9074963602.46	0.0120066255669	15818.2024595	2796.13547655	48.6282394523	11907207.7768	21311.6793859	2222.25041725	497.025087879	0.635439576041	16.6651164219	5.42995411085	214.029930017	0.00066910644973	10.6989722253	-0.369690015728	0.996079793799	0.0712316029811	0.978656841875	0.138253214266	0.904240530762	0.075355547506
0.752905102837	0.647253189767	40.1425554557	62.0198650085	55.3172667437573	70.2281994643177	67.6830850360708	71.2460525222275	46.6950728421	0.680856691732	12553.6459682922	0.168949800392	74304	72.626715509	217.455023832	563575355	5.50509378678	76.5954951024	3.28808356756	421.855686672	44.9391806321	148.993370091	150.841828399	3.24788655919	418.607800113	31.4938320736	452.5345913	0.148317947448	15216534585	0.0254954641867	3192.50993697	953.794248376	29.7977221628	486933.956299	796.413314358	399.982067511	136.488292031	0.492014038651	8.8534189026	4.5620870718	56.5562568846	0.000984506818827	10.3244503653	-0.133370113192	0.874433117368	0.114396904943	0.982409513181	0.199267540199	0.91109066328	0.120642508795
0.764564241797	0.714163766306	41.8104196931	58.5445827214	64.8999229583518	57.6281181368956	60.7453701939497	67.6830850360708	44.7610944998	0.707134308148	11551.1735746556	0.166402661807	69417	18.1510600762	230.592106942	480413535.855	5.96138993511	122.20530978	2.50529277943	397.437608696	66.2256863176	124.701262813	123.828489245	-35.4875202293	432.925128926	48.9314724802	432.271476356	0.280247914465	12971165468.1	0.0176793154536	6487.46663562	1218.08840459	32.7307243363	1623044.496	2423.43081455	838.952480699	251.976914218	0.538098352829	11.6118096722	4.96144427844	114.125370972	0.000685093109582	10.811598111	-0.189185242345	0.945028563534	0.105392086753	0.971191862998	0.182461103155	0.892655527993	0.109265882135
0.89579044041	0.678149682675	16.5922091365	24.4668832861	23.4307490277199	25.8069758011278	24.7386337537059	26.4952825989835	21.9172001543	0.760306316527	1865.29130095497	0.371423994615	5022	131.832231519	262.665210123	46860308.6715	5.01534005175	65.6707707627	3.38601120926	357.193285306	40.223491448	199.266594348	197.255430059	91.3650622451	265.828223061	26.6917654817	501.933405339	0.535180030711	1265228334.13	0.0361891548156	2670.01116352	568.530736198	23.0110984338	289394.137024	1989.97364396	291.461012967	136.448484607	0.360224933783	8.99540072452	4.37091555991	53.6521881195	0.00574803416265	7.55857066376	-0.471146890809	0.995081250086	0.120136336848	0.959226175021	0.2033041847	0.86809753347	0.112373843908
0.751274817317	0.552957981586	22.2850067741	40.3014469746	40.024992192379	36.2491379207837	43.6806593356831	45.4972526643093	30.2774622135	0.704516168273	4443.46973223091	0.269791726304	16470	62.3429845075	168.688333463	104840538.389	5.03125730419	50.1040069265	3.86025423317	268.403372082	32.9380386041	112.331523545	107.485289016	-4.62662691401	273.029998996	21.6282267062	414.571748994	0.662255837892	2830694536.5	0.037027680731	1852.44975499	597.197086231	24.0918784952	123526.187765	1083.69948647	181.9716982	114.967674892	0.225020685181	8.07566491058	4.40460308327	48.9123202226	0.00265077311411	8.8401907058	-0.237481768144	0.952417096329	0.12859108116	0.966583285588	0.214755662031	0.881681475933	0.137526487842
0.692324808415	0.520231270138	26.8535787695	51.6185402741	39	51.7880295048962	60.7453701939497	64.4127316607516	35.7367960059	0.6135382798	6724.90422537606	0.269848891512	24921	67.512492909	265.58455617	210408018.825	5.85275960201	102.498151572	2.69590262688	418.400395037	59.965928095	171.637973299	171.538946148	1.67176712453	416.728627912	42.6843938756	477.452633405	0.0922158880008	5681016508.27	0.0196248748429	5518.63928751	1265.39085337	34.1566611584	1158211.52532	-1371.12418432	677.513448595	282.882867102	0.412252253313	12.8477262899	5.03264173755	114.967520877	0.00115127438942	9.9145176914	-0.316574073757	0.98782175072	0.0835694786141	0.964786196013	0.157914776109	0.877103327738	0.0846438561615
0.886888029089	0.62972522442	32.5904753451	51.7534856176	52.4785670536077	58.9406481131655	55.3172667437573	59.2452529743945	45.8995468579	0.783615575996	8799.14234344825	0.163437392612	53838	-68.0626804929	29.3528684521	144820162.304	4.44800925548	49.6153434186	4.53538717647	165.833954146	32.3753440706	-33.5823742287	-51.8628993772	-90.5035761298	256.337530276	22.1432043246	269.495760722	1.41070565959	3910144382.21	0.0696402145252	1649.61372556	151.005642519	11.2760329127	112219.522006	2723.03822574	147.979256747	52.8684425314	0.465800565344	4.49573394173	3.6422295595	32.0631804052	0.0132674899363	7.7072062597	-0.142063837775	0.820709175711	0.300800721141	0.983508104818	0.37272492478	0.929359259107	0.297435813865
0.851015489582	0.685691423541	35.7507164089	52.1381997522	50.2891638427206	56.0446250768082	56.6038867923396	57.3149195236284	44.370415588	0.772994285214	9204.09744945714	0.163106458434	56430	72.6364106979	220.599794961	421521249.989	5.53146536317	71.4382363913	3.60235759959	400.574804291	45.6705219595	145.244206516	141.378657313	13.7895390352	386.785265256	30.8912325536	449.093318373	0.504228106423	11381073749.7	0.025614340331	3442.40517078	782.978175876	26.6534899292	593141.97019	2935.26773717	409.498685133	119.454832267	0.547382657934	7.94883852749	4.4365944663	55.1319998539	0.00124247824524	10.0340494722	-0.174629384455	0.921899810511	0.139815558101	0.982539751279	0.225658042139	0.91452148306	0.141294841837
0.966870422169	0.864079512338	38.6347442678	44.7120244331	55.1543289325507	53.0754180388623	53.0754180388623	58.0172388174411	43.2307339397	0.718525209503	8856.71760977327	0.185535394875	47736	72.9010373345	351.672032352	472605850.816	6.37478621536	147.120788712	2.86684010899	558.768319386	85.889745007	205.830079756	197.68973342	-31.8491148153	590.617434201	60.4987768902	517.021277698	0.341137989157	12760357972	0.0139572797445	11446.9320069	2485.57252157	48.2240008133	4683466.41399	5521.12194174	1272.36950082	632.727755348	0.335982650479	19.1028122897	5.62029654471	260.589300782	0.000557574795913	10.9785534765	-0.283265438077	0.986460167119	0.0563620281748	0.961260702073	0.12001274651	0.872478710835	0.0588098446558
0.932429436111	0.753164662778	26.6835075205	35.4285176127	40.8044115262063	41.7851648315523	40.2492235949962	42.2137418384108	33.0345926999	0.796172902991	4655.87099749103	0.219388888771	21222	59.5044033756	223.704130246	152197442.544	5.53030838412	98.0598474356	2.76266743947	356.13841126	52.0647566049	135.478483757	130.201843858	14.9182604321	341.220150828	38.7766621304	440.040251663	0.52708215778	4109330948.68	0.0244061146398	3993.91326841	619.259848083	23.498075987	506391.91385	4699.2428654	430.734372663	163.258639115	0.447571506905	9.38397165888	4.62971001319	73.4372764905	0.00176092603696	9.42915430445	-0.266672413813	0.971888044645	0.124780698976	0.97054217004	0.207009820587	0.891108463405	0.12685079773
0.892526432339	0.655924284127	36.9088543214	56.2699921539	64.202803677098	60	60.7453701939497	66.475559418481	50.2224553448	0.772950391133	10926.2812772453	0.149714052661	72981	155.293947067	261.65841697	720876004.468	5.04845212881	56.1418351185	4.00836095879	370.536811485	34.0712689064	214.624294595	221.31407595	14.6005357508	355.936275735	23.5577928578	516.425004455	-0.686593055097	19463652120.6	0.0364025994876	1856.62063917	1843.75980282	42.5657350451	134346.777762	-1753.76065837	184.38133897	57.1004826482	0.520014721847	5.59273977223	3.96296556649	25.3428937181	0.00245123546524	9.24635275289	-0.117901975497	0.819607558573	0.190076883354	0.989772222867	0.278147629274	0.9323995507	0.19412067765
0.784811244656	0.606218624286	19.3781960884	31.9656891295	30.886890422961	28.4604989415154	32.4499614791759	34.7275107083706	25.087032272	0.850956805918	2795.16014049651	0.256248637743	10908	157.875031793	357.708902455	128350613.785	5.8471785373	108.005424248	2.95388385524	440.555741442	63.0765611875	258.140357254	262.299155708	25.6006772097	414.955064232	44.0330954115	563.648417964	-0.320575716094	3465466572.21	0.020218606019	6178.88067717	2412.04217465	47.8397323862	1992110.10861	-10039.8937743	794.51591785	301.22376013	0.453366592438	13.563017437	5.0178345742	113.490086411	0.00208331602375	8.99445229109	-0.466958966905	0.997858948505	0.0715327064617	0.962359105541	0.14436280149	0.8706164021	0.0757779858934
0.865981062944	0.681390871088	22.6078020399	33.1789036208	32.4499614791759	33.5410196624968	33.5410196624968	38.6522961801753	28.7323022248	0.800971426427	3540.78948227745	0.249316257026	14202	186.875080516	405.43751463	199211924.203	5.92996330617	129.576950472	2.39601714753	484.591402819	69.9553231357	309.626218227	322.920358687	86.6751935448	397.916209274	51.4299907371	615.410345966	-0.421822994207	5378721953.48	0.0187873180182	7085.76797174	2561.18162996	49.5435768383	1272261.13316	-9749.06917788	667.791524542	244.008018308	0.456431318593	12.2598916554	4.91234915678	90.9090530536	0.0018219334558	9.23796838759	-0.395931542647	0.994726784834	0.0802715309369	0.965829363551	0.155704896195	0.875888670385	0.0853077289983
0.722339158989	0.664401063559	11.633245874	17.5093727449	15	15	16.9705627484771	17.4928556845359	12.647705583	0.894142685295	778.824829177801	0.450708813182	1728	260.384640889	580.208518938	34633951.7357	5.33961464834	208.430111854	2.10885162387	682.575676284	103.711583455	425.122330465	414.155200412	175.966658744	506.60901754	77.9813858643	735.632718053	0.0174403987733	935116696.864	0.02685546875	15353.1017312	3458.14635725	58.0450787602	4784105.18279	-10645.2387972	1383.7710761	1045.09972374	0.147221204179	25.9143500606	4.5930607158	348.65939524	0.0154703476716	6.05497105594	-0.816980054787	0.999877598395	0.0479485541943	0.919284508743	0.0990111990463	0.814570312443	0.0479499999601
0.807119173442	0.668228867479	11.2100336179	16.7757398154	15	15	15	17.4928556845359	13.5400212537	0.890285629915	765.817106897233	0.457477363738	1674	155.714712793	298.343356012	17859828.0145	4.81501581872	72.6155021406	2.51097183783	361.294796908	43.5560771611	234.016473133	236.454759835	127.782713372	233.512083536	29.8854078104	536.713836388	-0.0445136859988	482215356.392	0.0390218522373	2888.14859268	615.522112235	24.6946018817	155296.031438	64.3648048339	236.34850389	216.164123073	0.050922516115	11.8568793821	3.99758692278	71.4126024795	0.0165513968111	5.96834332434	-0.71743742452	0.999322268124	0.0697546052539	0.924616268184	0.14609914847	0.817383875847	0.0854056956573
0.800860737106	0.538560170094	15.0980783391	28.0341532433	29.5465734053883	29.5465734053883	23.4307490277199	30.1496268633626	22.4514526305	0.75263513457	2068.95634876485	0.358074826716	5778	154.252208389	407.110353456	78838037.0007	5.8931375226	143.860772451	2.67959946786	545.167404964	83.705727135	298.61541191	326.144377989	24.4394139073	520.727991057	60.5409387022	606.961318421	-0.433856223824	2128626999.02	0.0202201065595	10061.6306834	3825.1839744	61.0500824025	2297164.4924	-12257.0465719	881.637388861	493.437175611	0.27951343428	16.3812578888	5.06818312552	219.920045775	0.00423249069851	7.95566717165	-0.604451664842	0.999481723879	0.0771509981514	0.962454713425	0.145101979804	0.877544498301	0.0798299962165
0.91296046652	0.750185752092	25.4266217256	33.8937678498	34.2052627529741	36.6196668472011	36.6196668472011	38.1837661840735	30.9436701083	0.805315759997	4187.45370561558	0.227405979451	18414	111.706405036	269.399861135	159489333.112	5.43325301158	65.1359296878	5.15505652479	487.482045696	46.7296227996	179.448003903	169.078769443	39.1728485653	448.309197131	28.7901723066	483.585904616	1.18223744493	4306211994.02	0.0293040135534	3984.93869668	892.436788121	28.9383297945	840386.119983	8538.54449123	419.765255182	200.113566255	0.35048152029	10.1686499138	4.71414530395	94.7354175927	0.00196000848432	9.24949247178	-0.285033907064	0.976481987283	0.111621697063	0.978364575222	0.193788846095	0.906876350353	0.11501123505
0.874108096361	0.790921502719	27.2296721768	34.4277808647	34.2052627529741	37.1079506305589	36.4965751817893	38.1837661840735	30.0936019936	0.81167946926	4315.52401761782	0.221377039993	19494	152.194123746	375.232612758	253018772.547	5.84753685974	119.422321655	2.62270906071	453.864210609	69.5268438475	285.997819905	308.16299637	62.9548340487	390.90937656	50.7218466361	591.981007485	-0.709097321463	6831506858.77	0.0212360248924	7048.06828944	2479.96802617	48.93172065	1232729.27467	-12887.65227	625.387559539	284.439649995	0.3686345964	12.3831712994	4.99728328164	129.190614701	0.00171305283962	9.46632055929	-0.330898615738	0.988122216328	0.103502928946	0.961219822573	0.178058306018	0.876371035598	0.104105410678
0.705977491528	0.572875127114	26.2409589269	45.8057221982	37.589892258425	51.0881590977792	41.7851648315523	51.1761663276959	32.3378088552	0.798227655999	5438.00274245225	0.202216374478	26892	12.5510191741	177.831931678	146520946.696	5.34102094299	84.7571759459	4.09195713476	358.219952724	52.4629683213	77.731823378	61.8048980328	-8.97873671863	367.198689442	36.5066837037	383.548411851	1.19492852337	3956065560.8	0.0316970694021	4428.05384074	367.278347793	16.3784849535	1443010.11528	17684.7584937	544.127288918	148.504539046	0.570197914003	7.97263061773	4.40421208297	83.3440241666	0.00349666171449	9.00402251635	-0.264516688189	0.966429396504	0.198806255453	0.976528137866	0.275911698361	0.912375227639	0.191532816352
0.836944660014	0.728328315443	31.8448552436	43.7232146113	45.7930125674212	51	43.6806593356831	51	36.5939109876	0.745139355903	6603.26576618305	0.203465389973	32454	85.023501993	337.071038743	324103618.927	6.2166527392	122.909746826	3.14332865069	618.209455495	74.92307556	210.419180476	209.940375143	-41.9581107459	660.167566241	51.2048361522	519.265783759	0.0960303321055	8750797711.04	0.0157654602285	9109.21438478	2844.96352252	51.8814018325	3792190.52958	-8878.61094486	1093.13807431	480.306935312	0.391159492954	17.0347282603	5.42070408885	184.812969083	0.000785134654039	10.4673582414	-0.326610621077	0.991531574595	0.0590827899582	0.975050535345	0.125101853766	0.893345171045	0.0634035901241
0.70092726374	0.605617960033	28.1045955838	46.4064764233	45.891175622335	43.2666153055678	49.6588360717405	50.4678115237821	32.5275645392	0.759795540984	5831.00645930323	0.210285493862	27729	140.974794907	216.949462241	233578457.847	4.61474510263	33.1342391356	9.65027783457	400.820044609	25.7673110616	175.413553914	168.18541753	71.267940725	329.552103884	14.7158858553	476.904226785	1.98951883933	6306618361.87	0.0544376802003	1419.59428039	500.824991099	21.7789255473	259590.470597	4194.48926857	167.108348262	61.1197570434	0.463628564047	5.07654896178	3.79894932423	34.8705078517	0.00482459549944	8.32731012593	-0.181906101725	0.89752447221	0.229343283779	0.98773530171	0.315726576024	0.934869689203	0.232689640455
0.902171414549	0.813920210623	39.9088918118	49.0329288927	53.4134814442945	55.3172667437573	51.2640224719051	58.1721582889959	44.2361068186	0.831458378966	9030.79651468882	0.147605447921	61182	23.0815530776	184.388952267	393401609.877	5.64808978325	80.9334074233	4.41841043688	430.714375593	50.129418318	111.465809927	113.775860931	-46.7507972201	477.465172814	33.6783015396	416.666048184	0.499851369375	10621843466.7	0.0240700823953	4306.48296999	1109.26235102	31.7025853556	1043308.01651	2954.88990151	542.018335278	125.582464558	0.621870480484	8.07291014185	4.44151238987	59.1439193349	0.00111935118091	10.1748467297	-0.188598384205	0.936078748578	0.133243859925	0.987634258997	0.219351231096	0.927592453317	0.141539249115
0.930399529549	0.619921091118	35.4036298515	57.1098973059	61.5548535860495	60.7453701939497	65.8634952003004	73.6070648783117	53.135021586	0.726546242294	11160.7731208726	0.16254894512	68661	134.949623946	337.265929228	727766605.954	5.97560122427	102.718159544	2.93686488839	463.51264699	61.9990079666	229.224015315	226.172535702	-21.2104806932	484.723127683	42.9014144159	534.961935924	0.0359577461233	19649698360.8	0.0186614841324	6106.21450165	2868.69690172	52.2429150154	1797759.97196	-2429.37896418	785.813713388	228.543305728	0.549132258162	11.5827971926	4.92930433561	91.6270150824	0.000662585528824	10.8532563973	-0.190784037625	0.946615682533	0.090289453597	0.978068694086	0.167468872387	0.900706705264	0.0946349839105
0.821683409637	0.725871856601	18.3854353142	25.3287617463	25.8069758011278	23.4307490277199	24.7386337537059	27.3313007374328	20.8122233136	0.867447396276	1980.54450850856	0.295780243206	6696	16.2223093284	161.804998866	38472156.6856	5.44607943764	89.3598150266	3.22530039977	290.0629615	48.8562077554	89.2157712287	84.9099642397	-39.9116761223	329.974637623	35.0022014419	393.86503279	0.484891287238	1038748230.51	0.0262747138398	3640.74748182	667.484857574	24.5348911064	524172.145743	4269.40354777	416.166968447	154.951615407	0.456344986444	9.65834611332	4.48058114196	57.1793288748	0.00370737486073	8.18427816173	-0.485611866419	0.997300256438	0.100300573936	0.9690353405	0.183006873698	0.882336396953	0.109173981646
0.859791264691	0.836701104821	32.9744436863	39.4100635177	46.6690475583121	42.6380112106556	37.1079506305589	46.9574275274955	33.8844283534	0.83061568106	5758.30716220007	0.185130760102	31104	91.7382530864	311.906009909	304864050.6	6.04966368096	126.071872354	2.60661455248	397.423890272	70.3287798712	207.311244803	214.494756961	-78.8466923714	476.270582644	51.6825946372	514.430688055	-0.336777793942	8231329366.2	0.0167899426119	7274.23370854	3630.590648	59.2740257867	1920825.25973	-9683.72899673	816.265853445	348.004622738	0.402888861591	14.5379584398	5.19896359801	132.452119097	0.000870068737355	10.3314587609	-0.287523548829	0.984256637065	0.0701546443622	0.96633197141	0.140508559086	0.877319372578	0.0727635472964
0.711552748017	0.597256420862	11.6390570414	19.487537739	16.1554944214035	22.8473193175917	16.1554944214035	23.0434372436058	13.8664110302	0.835936141541	917.715382874099	0.459317008445	1998	122.212066304	364.790613427	23268372.3227	5.27183069015	166.700700894	2.23260176474	417.701871902	81.5318130239	252.227764091	269.261036095	22.7003384825	395.00153342	60.3737557237	560.747237016	-0.431209808194	628246052.714	0.0295836376917	9481.96038752	2805.17433598	52.5619273806	1524483.50243	-11877.6544621	707.871482815	544.416490359	0.129436394762	18.140736793	4.50837427318	205.97809656	0.0138798995437	6.22248999201	-0.753397641903	0.999713313929	0.0686969421105	0.931122855347	0.131994326965	0.831895092228	0.0719450461904
0.805323988163	0.583558756247	29.2372181877	50.1015842446	46.9574275274955	55.3172667437573	54.7448627726839	56.0446250768082	40.3480076371	0.748668224094	7382.39007744222	0.191070478491	38637	44.9838898968	249.317735284	301484661.886	5.91831341498	105.636099275	5.13206334884	550.609362748	64.22669504	151.319495068	147.014278028	-16.2613827718	566.87074552	44.4419023263	459.000114859	0.906138694549	8140085870.91	0.019268361884	6991.81881235	1286.89889331	34.0133418937	3134395.83892	14803.2854511	863.687846121	344.118579687	0.42948093489	12.9292885945	5.08265172979	172.863804879	0.000972295626346	10.3131599289	-0.263329513831	0.97755719837	0.103669590962	0.977355431653	0.177949193799	0.907129637444	0.104714457973
0.928854198654	0.814427152212	30.7272038204	37.7286092892	43.2666153055678	44.5982062419555	37.589892258425	45	35.0443771477	0.788449221865	5615.4488911574	0.202709150645	27702	134.809221503	415.660989328	341641640.512	6.36375599499	146.008109255	2.7011771522	583.764291001	86.6694568577	266.987259441	257.394729783	23.5213062151	560.242984786	61.3285502921	577.04770607	0.335795379873	9224324293.83	0.0138903138288	11509.5027122	2879.68688909	51.7414437037	4576084.17525	11656.9039666	1300.64279285	491.701402438	0.450577933141	17.0629362031	5.4309258138	195.856777903	0.000844919073353	10.3328057989	-0.370776832691	0.995441634174	0.0623967263583	0.965778133392	0.12883487553	0.878164437938	0.0633716367034
0.747716948073	0.583433470287	23.0840817455	39.5659195455	36.6196668472011	37.1079506305589	40.8044115262063	45.199557519958	29.5841086102	0.82994930518	4150.08355890065	0.218333520565	19008	-45.2535796013	176.141519199	93217268.5578	5.89703087482	137.127363498	2.52577779153	322.690221149	72.5373417249	53.5346118481	39.9539230754	-93.9364205733	416.626641723	55.0892255963	363.883075778	0.576357125325	2516866251.06	0.0190268272211	7424.17106314	852.287901621	26.7753457405	1644596.34586	14061.0070173	786.685389475	247.896371482	0.517320699209	11.4711675507	4.88817224837	113.416157531	0.00164742891079	9.48679642546	-0.349840253428	0.990954606741	0.106203320777	0.969380210681	0.183423718657	0.889641892369	0.110290120233
0.93720361181	0.712392918646	28.6406548533	40.2034524821	41.6773319683494	46.8614980554399	43.2666153055678	49.2036584005701	37.6788208734	0.758635077985	6098.6552445775	0.20609135052	29592	156.427263306	390.908647819	392477019.263	6.01054575526	133.514407978	2.62574397892	477.395044635	74.6398900167	291.629347334	311.657679406	-7.38001795697	484.775062592	54.9428036895	598.414129287	-0.603225280837	10596879520.1	0.018106651926	8074.18550369	4262.56740106	64.1986379337	1956806.8576	-17003.4304514	823.014166208	260.324439684	0.515161564866	12.0390706059	4.96190330987	113.63461444	0.00111120767689	10.0489322486	-0.290041644139	0.983206391878	0.0871161287741	0.975795944152	0.163984710369	0.898021805645	0.0931091083058
0.965508220668	0.885935887726	41.8722538944	47.2633002845	51.0881590977792	55.8032257132148	51.7880295048962	57.0788927713213	45.6331049605	0.820949751153	9200.13519022725	0.149057632452	61722	-18.734231149	220.715577214	318276314.615	5.42564705786	129.215606848	3.24476665154	412.523833718	80.4355904466	60.3073003836	7.73421186329	-61.780221003	474.304054721	57.6057659475	373.133332849	1.19253381681	8593460494.59	0.040075043113	9407.13337361	624.890363808	21.8263285799	3274483.46692	37119.1631514	876.445897447	284.462438476	0.501788092845	9.82259348697	4.55209927575	186.00418295	0.00564395126566	9.05985989865	-0.225577174057	0.945571441732	0.233404082456	0.974388240163	0.300591437229	0.919540253925	0.231134052579
0.826174058091	0.776338856538	28.6651035232	36.9234430066	39.1152144312158	34.2052627529741	39.1152144312158	40.4722126896961	30.5051907474	0.831904585653	4635.50602031409	0.205857803549	22518	-23.6410533548	266.956724533	154029780.431	6.30562472801	142.042827663	3.79011674077	574.335086344	87.4562168487	114.623930449	104.980623891	-84.2778377556	658.612924099	59.5980800469	429.753401532	0.784946085594	4158804071.63	0.0148945591728	12774.9824273	1794.5874796	38.6211302879	10470730.644	54616.3485383	1682.67899264	472.756997348	0.558113895431	16.0325342488	5.32958428624	207.94576158	0.00103657983137	10.0347663256	-0.408219500418	0.997061577323	0.0730725022267	0.975778773636	0.141706651362	0.899398209442	0.0779898527359
0.895698102461	0.8044811721	32.169930365	39.9884192206	41.6773319683494	45	39	48.4664832642105	35.8175512163	0.859575333417	5768.52890102577	0.175698370523	32832	40.1149502554	221.060117389	228290518.315	5.66986319407	93.2333178239	2.57073763046	331.376900328	54.0360556598	128.184190656	123.610541611	-0.229948863919	331.606849192	39.1221960467	433.28848714	0.342272972844	6163843994.5	0.0219266685422	4397.21196016	750.738808315	25.8808875763	688995.888482	2991.64377249	518.14077045	194.93697622	0.451794659433	10.4577043627	4.79386283706	83.5046211893	0.00114870201158	10.0339239381	-0.22497484947	0.959368484848	0.11227540594	0.963322643993	0.191120448769	0.877456608699	0.113144606535
0.800213715304	0.770112546636	36.3534285342	47.2053451058	48.8364617882991	51.0881590977792	46.9574275274955	55.8032257132148	37.7743645893	0.798004528253	7560.2248906161	0.171573731178	44064	42.4186973574	160.841977683	266076859.315	5.297258823	59.2057702537	6.53296019924	404.55657394	38.6267415407	100.309279634	96.4665876266	-41.2422394109	445.798813351	24.7700605411	403.778765225	1.03397429288	7184075201.5	0.0314099444925	2789.77188606	875.238164363	28.5256621931	605053.159126	4513.38262037	324.038784593	78.1769747915	0.608429465592	6.31148290813	4.10146706453	37.5628726312	0.00189301423604	9.45855814293	-0.191707734131	0.927285295111	0.168478143598	0.990912939575	0.257896587735	0.937885367792	0.174372761373
0.883450415784	0.499311888288	18.7794329144	37.6106264539	33.1360830515617	40.024992192379	40.024992192379	41.7851648315523	33.2271235786	0.778551070082	3914.75516083395	0.247424798435	15822	-23.6742051539	245.278511875	110338489.748	6.16269692106	155.550972773	4.69249038229	579.913624164	87.6785591126	118.881114532	119.629380047	-72.8999207623	652.813544927	62.2515765906	433.925037461	0.907795048823	2979139223.19	0.016290230521	12829.5500247	1562.02067866	36.1247112519	7223783.94975	31748.0296159	1475.89549572	450.177463766	0.529559078461	14.6690673207	5.14511849394	230.285777525	0.0016177337787	9.42278138286	-0.454648179005	0.998032561855	0.0878684636909	0.97742740776	0.159762407712	0.907562030448	0.0916369778563
0.68346046172	0.527502254749	25.9913078054	49.2724108217	48.8364617882991	39	51	52.5642464038057	33.6757446503	0.667820555168	5825.11706481819	0.25531961713	22815	71.9890122248	224.678746302	176907327.101	5.51817055158	83.089597296	3.33389506198	401.947512158	47.6725435998	153.556791976	158.899777956	-0.925840272274	402.87335243	32.9836047073	457.556317354	0.0454264377692	4776497831.71	0.0258548370155	3644.02000297	1096.58112687	31.7978436089	629274.85767	-2043.39736227	483.782973951	142.212099262	0.546562420114	8.94322409022	4.54521246135	60.5913719363	0.00159964127413	9.52264671447	-0.285293450479	0.978499093028	0.121104928108	0.980586845857	0.204254934514	0.907733113995	0.122694534644
0.963646538161	0.711299998361	26.0823396615	36.6685501499	42.953463189829	36.2491379207837	40.2492235949962	43.4741302385683	35.3355214113	0.69140358693	4972.25141922911	0.262332564062	18954	72.7335158953	386.099484101	205742579.116	6.54898715392	167.756835912	2.72704394538	556.352601013	100.393340271	226.81966715	225.067842561	-111.44921502	667.801816033	70.2326256564	541.369187368	-0.00929101230351	5555049636.14	0.0123740878727	15541.6353355	5216.73719541	70.4415421325	9816614.53075	-23938.1716768	1820.38088296	802.357318141	0.38906141221	21.796912467	5.70364394658	318.023584281	0.00113642679604	9.85080718495	-0.494806689717	0.999221991276	0.049432237249	0.961675275428	0.107959260826	0.871251423889	0.0508878473571
0.773373042392	0.627094532323	13.6683357015	21.7962922606	21.6333076527839	20.1246117974981	18	22.4499443206436	16.8566648584	0.845617322523	1279.87400907949	0.382280169976	3348	116.881335596	378.499264806	40108453.5546	5.72453774656	150.248122778	2.65574549641	509.274598038	83.9337541441	259.3925784	272.873471219	-11.6650649016	520.93966294	59.9266995033	568.73128154	0.0325805878637	1082928245.97	0.0218522372529	10535.2138328	3826.22683291	60.4448924694	3379578.44091	-5067.27081158	1117.9585194	433.999147374	0.437525763885	16.559178405	4.87502102673	151.726537708	0.00711648445006	7.17664231959	-0.706714777935	0.999793415813	0.0671728801932	0.964702445681	0.130942421481	0.872412182993	0.060885020695
0.779237108904	0.66206865409	13.0596742932	19.7255589922	19.2093727122985	19.2093727122985	15.2970585407783	20.1246117974981	15.3708875606	0.899776267764	1055.98775183984	0.383437818388	2754	131.589236978	451.872220975	39527169.4636	5.79968465561	170.867351721	2.31072835322	543.520215337	96.8653673991	311.319703497	324.933801535	50.5386000549	492.981615282	69.6062829631	622.512063539	-0.225889652964	1067233575.52	0.0199923106498	13809.4893681	3595.56490589	57.8653902478	5833272.50437	-22393.9765975	1536.913543	557.653634506	0.465050562556	19.4020653391	4.87167137382	167.353878247	0.00841543032993	6.92045635084	-0.769681578169	0.999909820624	0.0416661478092	0.95006920977	0.10218673485	0.846322117741	0.0360832439348
0.799615724501	0.625021548278	39.7474533244	63.5937327823	58.2494635168427	70.8025423272356	65.5209890035246	71.3722635202219	50.8505487125	0.804719584171	11997.997183018	0.134494632578	89208	173.730474744	248.719416594	864835155.832	4.62237601401	34.5244546783	4.42326192051	350.923126995	23.0613234373	210.672874101	210.733479666	57.9891926889	292.933934307	14.5097950989	511.618981068	-0.0934888405576	23350549207.5	0.0518142584526	967.197446879	1031.24767928	31.8246410129	41981.2133297	46.761846665	102.324714879	28.6418152958	0.559453560193	3.60606329551	3.39771889506	15.481677006	0.00542667187807	8.36405424888	-0.140962714002	0.840410472199	0.296634714384	0.992458102466	0.375947854388	0.94654388899	0.296918892552
0.790025200486	0.722324347605	20.7273621182	28.6953668209	27.6586333718786	27.6586333718786	28.3019433961698	31.4642654451045	22.6700629257	0.842246105298	2502.50078917193	0.275030309833	9099	88.2526948394	331.884214439	88092512.383	6.08206151526	119.634423159	4.36600041369	596.613658043	78.9401912689	200.717389203	186.768274637	-18.4739626587	615.087620702	51.8163911609	511.27498853	0.862296743246	2378497834.34	0.0172670358989	10684.2100462	2013.58513842	43.0201573064	5710182.613	26367.5983604	1181.21130015	531.363710951	0.377558692396	17.2073511947	5.27301072148	226.872705894	0.0024261553131	8.75575664179	-0.558316175635	0.999413974392	0.06056655294	0.969542087781	0.128168879044	0.887279479267	0.0653715011974
0.931770995119	0.771897384989	27.8814133652	36.1206216103	39.1152144312158	36.6196668472011	37.9473319220205	41.8927201313068	33.6561475422	0.846919428314	4704.93840656798	0.198923490892	23652	21.3716575529	118.610017586	121820034.016	4.87481386898	50.0264294539	2.89850389443	182.912158051	29.2522032908	71.066991583	69.0449320437	-18.6793669118	201.591524963	20.0879636654	372.912812561	0.214338888139	3289140918.44	0.040321823982	1373.25352951	353.132472547	17.9307989297	82558.4354024	314.609365125	176.188998484	49.8831537658	0.558352443985	5.49986765773	3.86894903755	19.0021030841	0.0026549064256	8.87206381949	-0.18541237734	0.912852545588	0.172286527101	0.972892509502	0.264520899395	0.889094230868	0.176121859649
0.907331153651	0.833242524631	28.0887418457	33.7101636263	34.2052627529741	37.589892258425	35.1140997321588	39.4588393138977	30.5862816528	0.820711523022	4350.39454171781	0.216858309243	20061	46.798305311	236.594368455	140482731.516	5.66977783718	116.913216216	2.49737544549	385.412173044	62.3066203982	128.5568105	111.246993448	-15.3158421988	400.728015243	47.6360309976	434.82756211	0.602658224273	3793033750.94	0.0226519747341	5414.06894445	845.827319344	27.8827366968	833277.865298	8796.01654662	538.544912835	266.017450351	0.334260237749	11.9285200338	4.93431737506	120.641537305	0.00175296293916	9.44797298478	-0.297541392727	0.981177629709	0.111366692125	0.96526927062	0.186839355874	0.88400870365	0.121233397533
0.858999469017	0.701057227497	32.9703115354	47.0294153491	45.7930125674212	52.4785670536077	51.2640224719051	55.4797260267207	40.398242813	0.800029303695	7373.81218622439	0.173069806746	42606	45.0139666209	177.927335246	270825348.648	5.37999783874	68.3685583022	3.50824232448	334.07252655	41.4046615002	110.923867593	109.996904246	-12.0990383034	346.171564853	28.6090622906	414.277318023	0.415419444872	7312284413.5	0.0280625071283	2767.27127031	662.112560586	24.4074150397	389503.534	1736.04102505	349.199138751	84.0491046284	0.611408882182	6.73413131082	4.18410303749	37.75054517	0.00154684816096	9.67617410036	-0.194769374605	0.934009329655	0.153227987325	0.984254621346	0.242556967026	0.91750870488	0.157730430075
0.769253005291	0.713176459323	17.6171242308	24.7023355868	21.2132034355964	23.4307490277199	24.1867732448956	25.8069758011278	19.0023458879	0.846089881006	1759.2604118327	0.325788965154	5400	-44.8159765658	163.67077239	26373023.6183	5.5601144265	132.070547833	2.68225093146	313.366477969	71.6082552149	53.2000261623	39.2137055132	-66.3012486549	379.667726623	55.3667638707	363.132369931	0.641517763743	712071637.693	0.0244	7114.85961027	606.329872681	21.8456083861	1912496.03574	18004.6621934	794.752105828	281.590030569	0.462519890306	12.0383157796	4.72008760212	128.69879105	0.00475658624466	7.81838618479	-0.554094918949	0.998715050978	0.114849489238	0.960259141617	0.189751825157	0.877645994355	0.109723741113
0.869141977874	0.810426730972	24.2696246659	29.9467228046	30	32.4499614791759	30.5941170815567	35.1140997321588	26.0279538892	0.826351860691	3179.38791949291	0.251076989615	12663	67.4021938083	222.488292885	98906986.7692	5.38007573797	87.9513227449	2.40509719316	274.202568475	48.2191890022	155.585498877	169.969292927	6.16086836364	268.041700111	35.7967163168	459.226629878	-0.520319854039	2670488642.77	0.0274094043944	3330.95080207	1144.22636419	32.6877352056	401343.027565	-5132.463182	381.92427429	80.0816670071	0.649409568385	6.98439092425	4.12887558147	29.3787941164	0.00282226746302	8.70855037914	-0.339315119493	0.985476863761	0.145868611952	0.974659349595	0.23256012646	0.892409235787	0.15298158997
0.931405800299	0.784935046054	26.8040241708	34.1480792654	40.2492235949962	42.4264068711928	33.5410196624968	43.3704968844028	31.8057190968	0.80721746569	4407.22993694589	0.220880566178	19953	72.1335579835	193.400805492	142636541.239	5.17265488401	58.6344436917	3.23067802027	309.960856083	36.4934670344	136.828850054	139.835239305	10.2508810983	299.709974985	24.5971282983	439.332346878	-0.117697708688	3851186613.44	0.0339796491986	2193.46677346	771.46250979	27.1730785285	161337.397136	-1030.30939245	218.667070609	86.7496298929	0.425724064227	7.14198421025	4.22793354443	34.8472479337	0.00248961046072	8.99305910779	-0.225345703058	0.946811966297	0.138187317911	0.977856445857	0.227094297286	0.900055657665	0.141102530487
0.967935281408	0.841687457985	35.93779823	42.6973194017	49.6588360717405	51.6139516022557	45.7930125674212	52.990565197967	41.3282418705	0.772257229944	7600.2140335387	0.179750580236	42282	111.343584085	326.627167448	397380961.139	5.83593729183	104.385971971	4.08033615524	515.849876021	67.3390145638	196.307150385	173.177346191	54.4593808185	461.390495202	45.1399861754	503.741404915	1.19660666989	10729285950.8	0.0221240309319	7434.61550268	1208.96416919	31.9402353036	3654187.87912	32204.8273483	1008.64744752	254.884637832	0.597818297193	11.5839017005	4.95286443177	117.857512697	0.00101524441819	10.3002723185	-0.256312127121	0.97531026377	0.105965503723	0.974326721912	0.183265059107	0.898760768809	0.109510296238
0.637106768925	0.560807482775	41.8711673014	74.6622835597	64.202803677098	78.5175139698144	63.6396103067892	80.1623352953243	47.5678462393	0.752232148432	13454.4897245621	0.140528605257	95742	-1.57442003685	118.352460075	416736526.279	4.59233583381	63.5472117514	3.24936467912	237.055408728	39.5071083613	39.4986507992	15.3517742591	-19.6448335174	256.700242245	28.8866811582	342.816264279	1.13895484666	11251886209.5	0.0645018703502	2263.65715984	158.556725739	10.7936864974	221676.771556	4854.94218205	231.160163113	63.39295166	0.564712786593	4.99150039262	3.78273094357	37.9223214164	0.0112241521535	8.14175040744	-0.125287095909	0.801396476193	0.294109965341	0.979566933646	0.364350352776	0.92149577856	0.285544959564
0.738876388274	0.680809423085	29.689073739	43.6084941428	45.7930125674212	45.7930125674212	34.2052627529741	50.37856687124	32.2212866503	0.774175542301	5674.30257471633	0.207257746173	27378	126.766357989	241.390829568	240841424.793	5.15826859456	56.3291337294	3.21314134845	341.15600489	35.0684947722	185.295196934	184.167859924	58.1706067091	282.985398181	23.7696207863	487.356335776	0.21282833664	6502718469.42	0.0332913179977	2004.76985426	778.096813261	27.2200174216	151613.913094	605.553254915	224.791421605	76.2409663296	0.492701264522	6.69662740312	4.15674080077	30.6647359385	0.00207415280064	9.23272605551	-0.190423120282	0.924221528441	0.147093160403	0.979011303266	0.236906807051	0.902642217966	0.152523605685
0.933286100222	0.83576834629	20.0651635107	24.0080443341	27.6586333718786	25.4558441227157	21.8403296678415	28.3019433961698	22.4063740705	0.843179176425	2161.65453686647	0.295429074329	7317	138.845088714	261.874954176	68958214.6019	5.04831894605	66.145578122	2.41361327737	310.145679325	37.4398341527	202.388607759	204.913357823	90.0853153591	220.060363966	27.2564362535	504.438654808	-0.0779514154412	1861871794.25	0.0345719693359	2064.04325816	584.806604258	23.8077486334	98596.1807088	-524.216170801	191.953644207	120.91009706	0.225052329811	8.56714462579	4.39492176668	46.3768585856	0.00418292219123	8.08840481299	-0.376358668891	0.98806091374	0.119161041995	0.949337351962	0.204407537044	0.852691937563	0.10901430955
0.917989571534	0.797910364477	23.3221747271	29.2290660273	31.8904374382039	31.8904374382039	27.6586333718786	34.0734500748016	26.8319777987	0.852122174686	3056.88260688997	0.244531046068	12501	-3.96046949168	145.162585501	62862046.4319	5.27009596521	70.701500194	3.18520840638	234.396297432	44.2193946516	64.1937592325	59.5566148999	-23.7775236581	258.17382109	30.8721325703	368.471380979	0.747060496321	1697275253.66	0.0297104525374	3134.0643364	351.964900577	17.0835467287	480485.859853	5415.73306374	380.802030323	140.77061658	0.46110307525	8.30457959878	4.41998336194	69.8737056374	0.00280452698163	8.72724295519	-0.332438517921	0.984265657109	0.156769892123	0.957761332827	0.23817462796	0.876594641799	0.162105117239
0.886238703816	0.807736471957	33.6234787811	41.6267928321	46.8614980554399	44.5982062419555	40.8044115262063	51	36.8912749235	0.758684256908	6571.41974574913	0.198520323417	33102	52.1110758551	191.45434577	236236000.8	5.27733808627	73.6772597305	3.70437934747	288.968275135	44.7922982723	135.295718716	150.051746597	-57.5972246934	346.565499829	30.5286090564	438.9628894	-1.00898921497	6378372021.6	0.0320728958482	3206.05553807	1730.09921031	40.664567037	684076.659296	-10035.0051473	406.304197339	100.871395607	0.6002670226	6.92873402736	4.24209767179	51.6966772847	0.00260622298641	9.19772960886	-0.222838704933	0.947670144831	0.180591171731	0.981451158122	0.264470873086	0.916977299561	0.188522286773
0.854802713622	0.724059356511	24.3683286479	33.6551533086	34.2052627529741	36.6196668472011	34.9857113690718	38.6522961801753	28.7685163756	0.856158397736	3672.41224799446	0.221523238509	16578	32.5909066585	386.125719525	176403544.879	6.53134401842	162.657853381	2.68106115131	566.353946143	102.054816622	220.44132587	225.855830334	-96.5726617114	662.926607854	70.7754550503	536.005774556	-0.161928362799	4762895711.74	0.0128330274061	16443.0166836	4319.76232735	63.7234983119	10621925.1941	-13248.2993579	1982.76297129	947.181197877	0.355105083057	23.3136052005	5.80342051806	393.416911612	0.00122207578144	9.74314156809	-0.51961721019	0.999453519496	0.0497283904826	0.955096094243	0.10730884498	0.864219434124	0.053457162145
0.881714659577	0.851648914525	21.0884683929	24.7619271665	25.8069758011278	32.4499614791759	25.6320112359525	32.5883414736006	21.8329541821	0.795431503758	2308.29275364191	0.312015781785	7398	138.472315316	318.609558398	75414622.4952	5.68135484111	88.2024313145	3.04218274164	391.254196761	55.8791061921	219.723370066	216.855818456	-3.34234637724	394.596543139	37.4905603477	524.629248635	-0.0914534242407	2036194807.37	0.0228568384038	5123.46713023	2365.67509869	48.0582093244	822078.593129	-291.10811297	521.644045968	299.333751852	0.26962759545	13.2620976633	4.94047531283	120.103802746	0.00319298298938	8.36583095326	-0.518195715553	0.998548295566	0.0759291541837	0.959473892994	0.15018867678	0.868722519317	0.0838327124443
0.90947133887	0.692435260116	18.4698696685	26.6737855975	31.8904374382039	27.6586333718786	24.1867732448956	32.0312347560939	24.2590435001	0.789470739061	2370.77315813768	0.311370259803	7614	132.336341183	301.056406854	73335883.9147	5.53245162494	94.5165149746	2.77829602416	387.92032951	55.0869648498	205.340961357	196.55034362	10.5098373907	377.410492119	38.5367426628	509.957180495	0.276695014538	1980068865.7	0.0253759871234	4686.83871307	1763.53351765	41.3770669298	627390.232859	3377.54453875	468.531128303	264.594738111	0.275416659036	12.8054543781	4.87492605894	98.7476804969	0.00323322886444	8.37018747212	-0.478286065259	0.997330644816	0.0788915635221	0.959772573072	0.152356871557	0.865764954609	0.0763794041431
0.851203235857	0.76462223649	32.9963096254	43.1537405672	45.7930125674212	47.4341649025256	40.8044115262063	52.3927475897189	36.7326036101	0.861217912838	6276.30884675848	0.167959453189	37368	-47.369234673	160.856371058	168913462.856	5.66126474222	131.686917361	3.26842464155	344.822635938	73.2042096173	38.2219253598	11.8754002343	-84.6242712681	429.446907206	55.3720486461	349.352686767	0.950843517444	4560663497.1	0.0283368555582	7653.22895708	692.243700649	23.1621754915	3447957.35322	32498.8395496	927.682274648	305.198488814	0.505163835473	11.565939868	4.90674476304	168.222122361	0.00310391140015	9.54485860559	-0.269424010899	0.97343199105	0.168935125416	0.965502617862	0.238882127211	0.894941820861	0.163746067645
0.78147059612	0.508433799587	14.9157519038	29.3366647063	29.5465734053883	30.886890422961	23.4307490277199	32.1714158842908	22.9257408562	0.742311282501	2188.25100744226	0.355466375478	6156	91.2713194439	408.706031499	73161788.2138	6.19864962695	176.323887178	2.88079182281	615.609735497	104.809363148	251.282717726	240.46593599	-92.4022574146	708.011992911	73.5658395171	566.467153527	0.169039051988	1975368281.77	0.0160433979686	16972.4011615	5290.08007196	71.4028604215	11146259.7283	13210.4711901	1955.76287002	1190.18006043	0.246447241658	26.7827403365	5.61935066862	456.679180994	0.00365880613319	8.1323111244	-0.680603724257	0.99988188971	0.0364969534689	0.950736170161	0.0889435458848	0.85466176895	0.0437794697209
0.817467882071	0.658805228067	17.8742334927	27.1312866553	30	26.8328157299974	24.1867732448956	30.1496268633626	22.17895544	0.808648655761	2242.8571734356	0.308805889224	7263	17.9811906963	227.556284528	49615106.1159	5.71253211667	116.059294267	2.40760609845	337.864599214	63.9915616931	122.425281378	124.540703225	-28.5473512086	366.411950422	47.7931987885	429.468012388	0.251522916116	1339607865.13	0.0214894763754	5999.65531769	948.274389401	29.016878006	1340832.06108	5991.04799342	703.026000379	279.482237969	0.429757799103	13.0305592963	4.89962736709	105.890733918	0.00323035810582	8.35221082121	-0.529194636866	0.998754609693	0.0883414110875	0.955618529138	0.159708144889	0.861573603556	0.0860158696334
0.834421163405	0.614651490534	14.6754340849	23.8760245618	23.4307490277199	23.4307490277199	19.2093727122985	25.0998007960222	19.9226601923	0.865511470816	1585.26784308616	0.331715388802	4779	64.1193003992	163.894128692	31328760.3319	4.71401700049	52.9864190663	2.58126289594	196.954898057	29.4018234234	119.138822871	122.755935089	17.2420039423	179.712894115	20.9524102434	420.712070118	-0.322370605204	845876528.962	0.0443997574133	1321.29310551	463.87379883	21.4444207112	46109.1099072	-594.150342463	119.623573359	103.892446708	0.0748252096616	8.06771386563	4.21502824856	37.6424700734	0.00605749232808	7.50823099072	-0.41585994704	0.989653240798	0.117134249269	0.937153200464	0.203505733305	0.835371228092	0.125312835779
0.796661448437	0.594067207308	28.8519198578	48.5667606338	53.160135440008	42.953463189829	52.3927475897189	53.9166022668342	38.6912658725	0.808942081794	6685.1176468724	0.178770360927	37395	-68.6319826101	165.015041377	159179909.017	5.83232280813	131.282266366	4.37714522502	441.505638821	78.9648237423	24.2848385424	-7.82469806645	-109.443848231	550.949487053	55.8445581064	339.015253713	1.27050338338	4297857543.45	0.0241249071407	9770.6857419	873.169929193	24.924386818	8631591.31302	70460.3790166	1266.83487505	260.818565983	0.657621698256	10.6044533204	4.78518885596	144.830588371	0.00202093573376	9.68125564347	-0.290138561412	0.980263133025	0.144862995499	0.981430184721	0.221838886745	0.920471557625	0.149416349276
0.769115590547	0.731276645729	20.329068526	27.7994226189	28.3019433961698	28.3019433961698	24.1867732448956	30.5941170815567	21.3809693444	0.856961393722	2341.3244566899	0.277047030729	8451	-21.0672814693	102.996866403	34881128.9765	4.96311878383	71.4507619043	3.62204067702	209.510696673	41.9807044388	29.830296015	13.9174422781	-40.9520912442	250.462787917	30.370664711	333.82825919	1.04905573484	941790482.365	0.0400228643755	2653.28246481	201.912140804	13.1045378968	202044.426775	3741.96653407	222.249577628	102.399550164	0.360376662431	7.08388091803	4.18435474901	51.5042044348	0.00557904943106	7.89161138088	-0.319613867279	0.974334164468	0.181486398329	0.966610712672	0.264285696721	0.889674541472	0.183199415299
0.759528589394	0.676743103639	31.2802596492	46.2217634446	47.4341649025256	41.7851648315523	47.4341649025256	54.5802161959807	35.1067507884	0.732953140959	6831.67498559527	0.20504457007	33318	80.5754919141	404.47801681	366992724.129	6.48911989774	186.61574422	3.34825735996	764.637739044	103.04509669	230.694781706	209.606467655	-9.00875520426	773.646494248	75.6737401903	545.344763396	0.695610175642	9908803551.48	0.0126231648406	15763.9596335	2912.37375447	50.666707339	12261299.49	42834.1315512	1999.26431086	621.299963275	0.52607118259	18.9275298652	5.5986557348	256.319296311	0.000701874818506	10.6001039496	-0.373181703677	0.996118532383	0.0610254290608	0.976241647423	0.124504707151	0.898271088016	0.0657569973525
0.83029481417	0.541116525344	18.7287136924	34.6112395671	31.3209195267316	33.5410196624968	36.6196668472011	37.7094152699296	28.7375327246	0.820383439265	3234.30558630485	0.251657764263	12852	-39.5564176526	252.524863495	76809250.2548	6.13017735882	172.283724899	3.68065614207	541.39696374	95.8088526296	84.2363272365	51.459149841	-75.5218510079	616.918814747	69.3176571469	401.701345683	1.01883166173	2073849756.88	0.0169126474119	13726.4159553	1136.84090952	29.7799174618	7721593.6537	56960.1986559	1522.77365597	525.404932971	0.484827094112	15.6339305749	5.20563463756	273.835644586	0.00199367766792	9.11961904033	-0.477926767721	0.998358798517	0.0884342995787	0.971626404675	0.160406540841	0.899341531126	0.0887127981387
0.726924111756	0.697739042512	27.1845924527	38.9609736541	42.1070065428546	34.2052627529741	42.953463189829	43.8862165149833	28.3216711666	0.783300659384	4513.07131074049	0.228348072796	19764	146.504266787	312.598119592	218896438.804	5.51406741702	86.7985350845	2.50133443774	406.853736785	50.5347925868	243.365146404	254.432939497	93.6897049799	313.164031805	36.585244555	546.844448472	-0.40177356165	5910203847.7	0.0249410254113	3793.16849778	1177.69036683	33.0123374139	646540.980903	-7107.21675232	451.378113126	101.268347781	0.630459463448	7.59254191844	4.33009189587	42.6341780952	0.00197889844592	9.24557539176	-0.287699236539	0.977169448164	0.137139381683	0.977383768486	0.224292256433	0.900816470639	0.141263245404
0.867219315728	0.735858505239	20.0554800377	27.2545331676	29.6984848098349	29.6984848098349	28.3019433961698	32.0312347560939	23.6356576041	0.785784304429	2526.13813531465	0.30376841454	8316	118.078343094	228.677933586	68327449.173	4.93899808592	45.2188180282	5.07786432692	333.787951666	32.7702693031	168.878342197	163.695334526	70.3721392805	263.415812385	20.2319338559	471.001451638	1.14623023412	1844841127.67	0.0398675999325	1995.46766317	426.354071302	20.0432423575	189013.533993	2729.82732387	183.626606628	85.4232123641	0.353995950635	6.72572592821	4.07702706237	39.2406593235	0.00462692029878	7.99641291242	-0.323806752886	0.976725635308	0.148520131569	0.97344206683	0.240052669083	0.895944412612	0.156019363624
0.920721538486	0.671879869547	12.2292899275	18.2016019258	16.9705627484771	16.9705627484771	16.9705627484771	20.7846096908265	16.758606928	0.913407816331	1005.95001106973	0.384096987808	2619	54.5589009909	133.926671899	15345702.2614	4.4632070105	38.8997090134	3.94539722996	174.067387431	24.6729791763	96.4193064672	98.8743021521	-10.7518767131	184.819264144	15.805269261	397.747553225	-0.593704112997	414333961.057	0.0547348283558	1054.84955676	594.370300662	24.2880544176	25717.4553668	-317.02499584	86.6197603838	69.9146125425	0.106544436735	6.27185232636	3.74277193957	29.755713187	0.0118643065996	6.53059163688	-0.504850549621	0.99345264795	0.155108356907	0.959346633113	0.247364117888	0.869865234186	0.156850517169
0.826834177338	0.71386941964	30.6998344299	43.0048319557	45.7930125674212	40.8044115262063	43.2666153055678	49.4772675074119	35.5578648516	0.837131999476	5952.37224795735	0.179965903188	33075	-62.3974799674	27.3014517991	91702191.8952	4.3707384697	50.4409167762	3.5173947579	112.80092154	30.1297701337	-28.8390332171	-46.1080162676	-76.4451589604	189.2460805	22.1048478225	273.603604069	1.12258779313	2475959181.17	0.070114119117	1330.66225269	113.078048952	9.40044085636	86829.6904985	2230.20363377	134.523779191	36.1237949532	0.571106260388	3.98411857995	3.49997786888	19.6888542568	0.0132729503181	7.51910901938	-0.169178772761	0.85464720023	0.313112343347	0.979006587339	0.384216517438	0.915845288474	0.299901927938
0.8704979712	0.745703597523	24.8767906986	33.3601591588	34.9857113690718	36.1247837363768	34.2052627529741	38.0657326213485	29.0399508666	0.825178064763	3772.96296449247	0.230974163728	16335	71.0416013066	204.780576604	116709008.925	5.30303796274	62.6065098129	12.3019764438	589.467856308	42.9477881463	134.916733943	125.33482464	25.7302452538	563.737611055	26.4945922759	439.212309446	2.06082989028	3151143240.98	0.0314541356465	3754.88730591	488.057256897	21.023968822	1208697.44459	10124.229057	352.122633146	168.495352305	0.344413336835	8.83765884212	4.48234877876	89.0792269347	0.00232628403229	9.00215915665	-0.279658513265	0.972534400979	0.128640756339	0.988230887104	0.213504690579	0.932134943278	0.130663250478
0.871054169745	0.793027760718	22.6641965734	28.5793230654	32.310988842807	32.310988842807	28.4604989415154	33.5410196624968	24.8941385246	0.820491419304	2903.72804526971	0.26554440286	10935	99.5011983402	282.247185457	100479335.802	5.69830763862	92.1585691822	2.87003665421	433.560282517	55.1430289097	193.20299857	194.043045944	25.1762728276	408.38400969	37.9035084198	498.093490658	-0.0373730411523	2712942066.65	0.0221734491693	4847.92763763	1176.05011167	33.3130964864	856209.821179	-3147.78546473	557.249227322	292.474392441	0.315143631136	13.24091528	4.96328667779	112.808867058	0.00220780261124	8.93028967889	-0.441761552799	0.99679483	0.0718975760134	0.962033314398	0.146101806226	0.870942108035	0.079751529447
0.853700141934	0.74142871306	21.1793393082	28.5655774253	28.3019433961698	30	24.1867732448956	32.4499614791759	24.3864375024	0.879449142972	2637.23585390824	0.251093578397	10503	211.472449376	413.426783924	154679225.008	5.71857249268	132.412546116	2.927095366	484.50811059	70.9377342106	324.985031814	343.022832821	4.39169254291	480.116418047	54.5389040334	630.581453242	-0.700323901055	4176339075.22	0.0235195379359	7026.6791818	4920.99495647	69.5204177361	1141651.76559	-11825.9603822	604.31755693	255.925952932	0.395261909107	11.522565897	4.80812606123	120.598350321	0.00307871867486	8.61546377707	-0.423615659666	0.995033924754	0.117901909213	0.975537946896	0.194157995746	0.902154904289	0.125972263093
0.758670297499	0.650894792326	30.4958515629	46.852197809	49.2036584005701	45.6946386351834	45.7930125674212	51.7010638188422	35.5453708502	0.765428820824	6675.44000966551	0.194369904777	34344	145.945886854	465.730651468	475712070.693	6.32261779586	236.826323816	1.69048087175	553.157901587	116.193278372	297.815121222	269.52683059	15.861093136	537.296808451	96.6727520244	611.545155291	0.0840796045748	12844225908.7	0.0150594814287	16604.5577985	4188.99110806	61.0174853452	8480264.35443	-12027.1517026	2222.54643931	363.700002337	0.718035257583	12.4232695514	4.98922147877	204.855639987	0.00112628373948	10.1725707768	-0.372068828041	0.995145462032	0.132084810761	0.973627354715	0.207612634935	0.90758925621	0.136662373424
0.899417036235	0.654917846591	35.4138646297	54.0737511033	52.4785670536077	61.5548535860495	57.3149195236284	61.8465843842649	48.6348529555	0.816473869971	9566.22634575155	0.147381314256	64908	-41.8133389203	93.153448756	242321543.462	5.02651071862	88.4494682262	2.55606471711	194.185693046	47.2088449113	12.746408681	-5.81561925763	-67.5070105239	261.69270357	37.1241727943	317.489072134	0.752355556288	6542681673.48	0.0427095993643	2988.99478147	298.283726245	15.5104679353	268716.311766	4286.82129529	322.050253512	91.6139974197	0.553088882928	6.14326574177	4.08656147368	52.9409279948	0.00620982016059	8.90738813698	-0.168206762909	0.89151373228	0.255254929527	0.972640800645	0.327489555213	0.907566783543	0.243663771128
0.852561858004	0.670366570095	26.6731938893	39.7889678262	42.953463189829	42.4264068711928	40.8044115262063	45.4972526643093	33.922556338	0.731429403174	5402.12908355545	0.23130503462	23355	110.015611886	267.394145555	205868105.663	5.60229170264	81.9830852248	3.38629936303	432.500254612	49.6459090016	183.817283315	180.848197635	28.5065111426	403.993743469	34.5571637197	487.850192185	0.481322633113	5558438852.91	0.0239166026262	3918.64638094	1141.87222021	33.0967057039	570021.076411	2523.73958894	420.33051912	234.703366716	0.284275240498	11.7654448108	4.91242787811	94.1771822371	0.00132776963479	9.74221344916	-0.2677357335	0.974998964887	0.0871271583887	0.968914236388	0.164298555035	0.883127817669	0.0893483028429
0.830218043375	0.7129444216	21.8614692294	30.6636373987	30	32.4499614791759	27.6586333718786	36	25.4575050439	0.79235605961	3105.02811590264	0.270590685482	11475	138.269553721	296.005165454	111302706.28	5.44264034715	87.8412658628	2.54922858206	392.607455899	49.4457801461	208.213907728	199.911551414	75.4554881794	317.15196772	36.055645495	511.750643047	0.422758980688	3005173069.57	0.0264470588235	3607.34465166	824.866882217	27.4282047197	446368.794792	2516.92162448	449.482579178	159.543914106	0.476113108426	9.43150508608	4.55624692745	68.0467385903	0.00251174426095	8.80341290804	-0.382793886878	0.992137727801	0.114225539876	0.966217594411	0.196601302397	0.881553870562	0.120905751741
0.936489498237	0.793604007958	30.9810443781	39.03841723	44.5982062419555	42.6380112106556	41.7851648315523	45.199557519958	36.5590677637	0.825496866311	5733.50120340733	0.187259167921	30618	29.9584593962	379.598433287	295434973.305	6.65831101071	158.560212649	3.76204459106	708.943466062	104.756834631	191.705450196	182.807390175	-118.109963931	827.053429994	68.9681689773	510.416171195	0.647332035034	7976744279.24	0.011977081642	18750.418065	4189.84266475	61.9083316943	19156972.5997	54369.3868109	2281.86214639	854.259888778	0.453789452324	21.6594803632	5.76070301703	374.731710872	0.000708627335316	10.5677441961	-0.415885724921	0.998042375946	0.052023779863	0.972710220321	0.111794870195	0.892989399314	0.0533517588454
0.684482786297	0.58851983547	19.672762801	33.4275271883	31.8904374382039	32.4499614791759	30.886890422961	35.2420203734121	22.8805669489	0.809607045403	2810.47820438444	0.275375093512	10206	125.301878782	319.330386616	101710576.463	5.80888869362	106.736420005	2.75485660526	431.268463911	61.5817971414	213.123817895	205.243630003	31.1369326125	400.131531298	43.7422309015	518.724974441	0.362419551452	2746185564.51	0.0208560790571	5779.54661834	1599.3621978	38.7031696318	1234786.68699	6478.82984427	659.263294065	254.777666785	0.441246864319	12.4701196049	4.90303139041	96.6204596293	0.00233099773858	8.84159029686	-0.465388992452	0.997633922949	0.0804920692949	0.965276669582	0.155659295962	0.875625918797	0.0828974012874
0.808119752611	0.670241390649	18.4158514849	27.4764461608	29.5465734053883	28.4604989415154	22.8473193175917	30.886890422961	22.2042588741	0.850402055179	2252.63537790289	0.285722396994	7884	114.396793737	220.095928397	64922540.6042	5.00278444038	57.2439670786	2.98468220736	266.016516078	33.6551737322	169.638884716	175.196487309	21.9232901938	244.093225885	23.3533238959	471.526741365	-0.348735394999	1752908596.31	0.0374366672922	1776.78578549	1006.43090899	31.4158469596	81737.3784662	-814.063235272	156.790572094	79.1420272704	0.322466803776	7.04635506292	4.13843155197	29.0903291246	0.00429942448046	8.07723074021	-0.338273008067	0.980993128743	0.133751250802	0.970990523158	0.223147001381	0.883895278043	0.137181644329
0.846502869211	0.715611748791	26.5175270003	37.0557457239	34.2052627529741	40.3608721412211	40.024992192379	41.3521462562706	31.3677950761	0.834535302005	4464.42339854752	0.208774008537	21384	69.5234404069	241.285664444	164090954.064	5.64184749274	94.0377367232	2.60783633898	358.093288414	53.5062213224	150.481692679	144.53557757	5.93769317838	352.155595236	38.9209420628	455.176392248	0.330151928141	4430455759.72	0.0228324915825	4251.79262094	963.506295759	29.3428940681	806649.006568	4254.69232871	575.288449917	165.421221051	0.555069109309	9.88207201066	4.67768688806	66.195275716	0.00143181069253	9.64334187512	-0.298454958154	0.982828162866	0.104246401121	0.970484876684	0.185891686845	0.886063589679	0.106604347241
0.911815467771	0.609150265695	27.6902475182	45.4571705499	52.4785670536077	49.6588360717405	48.8364617882991	55.0726792520574	41.4485512285	0.738842747126	6897.51038082331	0.201628529943	34209	161.582924214	540.975547331	591490252.231	6.6828754281	256.349715363	2.10582638168	631.851672515	130.074880963	366.493934855	390.535656123	-39.0070743579	670.858746873	102.899520167	683.259200557	-0.414890295889	15970236810.2	0.0110652972767	22628.9699479	8066.58512304	86.6417862609	19512342.9794	-89645.4708734	2819.12172939	585.257529282	0.654278379139	17.7444416663	5.509492184	263.79572692	0.000752462829085	10.55309852	-0.397938157921	0.997343733321	0.072658870018	0.971394471305	0.139120742765	0.892968584221	0.0759122974238
0.795021410219	0.603261213566	24.346293669	40.3577971225	42.1070065428546	36.2491379207837	43.6806593356831	45.4972526643093	32.0853127817	0.796475475607	4709.20450349154	0.218018727013	21600	-16.4896974703	242.847337275	131339884.881	6.01934374669	156.127028048	2.89678602961	430.690331972	86.7986185364	91.4960501032	64.6510763828	-80.2546058606	510.944937833	64.5174743024	405.184965295	0.830639108397	3546176891.79	0.019325	10905.698855	1399.02995665	33.5097741434	7156773.07983	58986.2281473	1471.00530266	367.401856159	0.600912198314	12.7880025485	5.02529490513	199.59001462	0.00173424237284	9.54945632774	-0.383358085919	0.994560478624	0.117821943249	0.971563676018	0.192889819558	0.90149716854	0.120333146085
0.91035047742	0.874618935581	38.8738053864	44.4465627314	49.9299509312797	48.3735464897912	48.3735464897912	51.7010638188422	40.4619496022	0.822737906052	7885.80533702512	0.160476299085	49140	154.100552977	331.669883491	570027994.064	5.69583476115	84.8942632717	3.20812170549	510.471553279	54.4613979619	255.383450318	269.422863501	21.0288330155	489.442720263	37.0364343458	559.644703844	-0.63486402742	15390755839.7	0.0236438835889	4751.41765356	2500.90987956	49.1753681442	779343.865078	-6868.26223003	477.227823744	147.281618889	0.520691322348	9.1983000536	4.59036534246	60.4426193868	0.0012179466164	10.0869410695	-0.187674451126	0.933299590436	0.111314807467	0.985854582887	0.19486956672	0.91944363073	0.114933900512
0.772643392944	0.586393510768	34.668720534	59.1219375682	57.706152185014	60.7453701939497	63.5688603012512	71.6868188720911	45.6801744401	0.736649593651	10102.9192029937	0.16734445112	60372	101.821261805	381.844794301	592827159.137	5.99742680421	147.76413722	2.92468055123	538.585069078	88.7088616345	203.516155383	162.458617498	18.9875660922	519.597502986	64.1164065933	514.906229691	0.996274101874	16006333296.7	0.0212268905949	11599.9066424	1795.55768144	37.7015628251	8304680.23824	70359.1211834	1723.40481778	227.48108497	0.766465952958	10.0738028973	4.76330214123	122.989707943	0.00156247783349	10.2277181717	-0.28299541662	0.98211867808	0.15088956963	0.981514809506	0.229144301763	0.919927191374	0.148010326368
0.830569695887	0.671048618081	22.2585189765	33.1697560754	36.1247837363768	30.886890422961	34.2052627529741	38.0657326213485	27.5497942162	0.837224162594	3404.6211541572	0.23791901846	14310	-7.86359243574	134.564640809	67172521.2224	5.17251883868	79.4058694516	2.65848201607	202.837162869	45.8228554168	51.7858960331	35.1364995515	-36.3185214255	239.155684295	34.2895680304	356.006469155	0.765719041795	1813658073	0.0337771448914	2987.28943211	328.42993028	16.632240474	274196.391321	4489.41900485	298.171952697	91.8443638588	0.522643391915	6.6955852459	4.11617413979	45.5777599148	0.00388102707044	8.44497678187	-0.300192112365	0.973200833403	0.174700406106	0.967884648236	0.260849456087	0.890951863731	0.182755689312
0.630428064701	0.544639536731	33.4048912115	61.3339446711	54.0832691319598	60.7453701939497	55.8032257132148	66.6783323126786	38.6666400395	0.75848311607	9060.28435288661	0.169136132633	53568	-16.1354365625	184.105663444	300395575.123	5.83103269209	127.650217489	4.70003211812	559.622194365	68.0433834132	79.8920244251	72.9437216779	-58.0611035368	617.683297902	50.872291782	389.113171252	0.96419361391	8110680528.32	0.0206800573946	7091.10981998	866.813366822	26.5939100378	2681053.73481	18867.7737678	857.281454568	219.601264211	0.591064413598	10.0895459589	4.76549726704	116.282610232	0.00131385904861	10.1955769725	-0.225330131035	0.961172799509	0.13177185082	0.987043109161	0.211215484959	0.929933968345	0.139082828138
0.86690921914	0.755435576901	24.9119352079	32.9769155302	34.9857113690718	34.9857113690718	33.5410196624968	38.5356977359953	28.5879920919	0.785473428143	3858.15102958178	0.245945753145	15687	50.2516152652	216.186964839	105715745.47	5.49643077037	74.7722279438	4.08043339157	373.23907292	48.5852032809	121.805995148	113.15870902	-7.00301797033	380.24209089	32.1059218772	426.561615104	0.936713880947	2854325127.69	0.0269195789798	4034.51393762	751.589603446	26.2233685372	692426.536649	7493.44191616	420.594726704	165.205907897	0.432410730901	9.66367130524	4.61636781376	69.9044544575	0.00203750971314	9.13944642668	-0.313356378245	0.982947075879	0.106407931785	0.975067291459	0.188727702922	0.895970862509	0.111922463349
0.670774732204	0.540298677926	24.5297282524	45.4003114473	47.4341649025256	36.6196668472011	45.6946386351834	47.8121323515276	30.453381753	0.787170046577	4969.17704669049	0.216013608359	23004	-34.8006969318	320.122442813	180398007.462	6.4082680588	252.706802129	1.72559020133	451.538112888	121.523454078	139.420526324	136.083293607	-69.0199976884	520.558110576	100.796448187	460.14644467	0.137350582211	4870746201.48	0.0132000925742	18644.3515877	2515.97648523	43.101540847	13516369.5058	199.401483479	2951.10689562	319.470470755	0.805030990296	13.2288524729	5.09367268655	140.116276513	0.00119054187485	9.92532520875	-0.442690234462	0.998213633238	0.0958584636675	0.973872764522	0.168741298635	0.896361174129	0.0998294430002
0.923360897908	0.606168331841	22.0859002847	36.4352591922	39	41.6773319683494	36.4965751817893	42	33.6428936432	0.771349775966	4242.68061802796	0.241006624519	17604	98.1763718561	337.365158381	181544446.297	6.05592788699	152.120222375	2.18285782478	506.430695308	76.9101210628	219.785952105	217.096940538	-0.704050625481	507.134745934	58.9236390096	527.676418172	0.0628820885571	4901700050.01	0.0166077007038	8264.9662892	2309.92817525	46.3017085342	2035043.60117	-189.372596798	970.538633285	307.44965689	0.517885985541	13.4522239029	5.07231005085	122.48232019	0.00137991171581	9.62330715591	-0.405214663853	0.996218923922	0.0793161625288	0.973608300811	0.152095965608	0.892009519678	0.0866309643432
0.661070941395	0.649777674493	28.1197719275	43.2759896674	37.9473319220205	45	39	48.3735464897912	28.6084992292	0.733155274224	5107.39285960788	0.2370459881	21546	73.0423455531	279.292259022	186416780.149	5.98346615027	106.159153721	3.31073471368	495.548227588	64.5209357585	176.339253447	173.878941337	-7.28015816611	502.828385754	44.3440337055	483.326998683	0.33313308333	5033253064.03	0.0184012663237	6705.90328067	1647.84037809	38.9240183124	1886546.34971	-1452.68951095	832.648464029	302.269833923	0.468008605535	12.9016199319	5.04015537214	132.144697453	0.00124376658675	9.80578365685	-0.367114278934	0.99384520848	0.0872276755274	0.974098212831	0.161671463393	0.895761540892	0.0940981876069
0.779597179606	0.60835027516	32.343906371	53.1665846005	53.160135440008	62.4259561400544	49.4772675074119	62.7136348811006	41.4485194038	0.790836091229	8221.93429492362	0.166766749725	49302	230.795954842	494.461926859	857881511.749	6.15003645444	149.699914059	2.27382947237	551.390757447	81.8975251929	378.453078315	397.049809734	105.713436937	445.67732051	61.8183391892	685.430250689	-0.481621687706	23162800817.2	0.0155578002541	9516.04908441	3666.19863854	58.6513609061	3034873.91363	-19552.784954	1085.94311276	182.796100392	0.709343811324	8.70366672305	4.51227632822	105.704127054	0.00121078580013	10.1934654865	-0.306550041927	0.987010695501	0.175869575105	0.980125161601	0.256003363363	0.92029288497	0.180256260801
0.922134842276	0.814060034814	19.9574232888	24.5159109098	27.6586333718786	28.4604989415154	25.8069758011278	28.6181760425083	22.6069756401	0.788684989916	2316.6957099578	0.315454208872	7344	225.847712253	455.351578194	116802534.985	5.95964501113	129.940575379	2.53832889043	571.252682506	73.9775556003	349.103386449	357.677480259	119.349209798	451.903472708	53.3173665937	655.302284831	-0.199475063641	3153668444.6	0.0183012543253	8085.87820514	2701.23771647	51.2540974479	1485145.827	-6675.34839219	722.935181667	428.849136608	0.251918167641	16.4228510938	5.17734330213	154.912604002	0.00300685469772	8.43111563179	-0.559271536212	0.999275285761	0.0578400523364	0.955728441117	0.124204177327	0.859104231892	0.0636462738969
0.709629086056	0.616621631853	29.1452321866	47.2659904893	44.5982062419555	50.9116882454314	42.953463189829	53.160135440008	33.5413216325	0.719546349896	6484.59980157947	0.216369696416	29970	30.1842718836	495.113779446	365679567.353	6.9178919222	299.763091709	1.99701760832	716.072296753	151.529990906	246.630694699	221.723759268	-58.0893510924	774.161647846	120.116191176	573.969556396	0.323041311291	9873348318.53	0.00915185455726	30635.9352817	5235.40850807	64.990720741	39854445.1401	27963.4499565	4702.94273467	659.229634862	0.75494385277	19.2167000822	5.59434121256	281.020408553	0.000719039509331	10.5360423804	-0.482595860197	0.999380536398	0.0609702642391	0.975525701602	0.124340915862	0.897846361882	0.0632655358545
0.830891434248	0.723361558926	22.2609700741	30.7743338023	33.5410196624968	27.6586333718786	31.3209195267316	34.3365694267787	25.570130351	0.803934608014	3065.10701432088	0.266484699558	11502	115.184505723	322.520736625	116620451.647	5.78007415924	121.17245483	2.17274172521	435.69672308	64.1974903291	217.620647772	217.621178395	66.0853769988	369.611346081	48.8713171578	523.217859739	0.121777505573	3148752194.48	0.0199475412727	5825.7937505	1266.35851539	33.5075562396	1296410.70638	-1519.65354163	755.998884518	184.221231124	0.607147988384	10.5953213485	4.68652061474	69.0601199677	0.00210734968619	8.99348922239	-0.442587378407	0.996963505109	0.0940394749587	0.970337781668	0.17368014321	0.884102088833	0.0948889081376
[truncated: 1,260 more columns]
